40922693-file00.docx

1 **PDIP38 is a novel adaptor-like modulator of the mitochondrial AAA+ protease**  
2 **CLPXP**

3

4 Philip R. Strack<sup>1</sup>, Erica J. Brodie<sup>1,§</sup>, Hanmiao Zhan<sup>1</sup>, Verena J. Schuenemann<sup>2,†</sup>, Liz J. Valente<sup>1,f</sup>,  
5 Tamanna Saiyed<sup>1</sup>, Kornelius Zeth<sup>2,3</sup>, Kaye N. Truscott<sup>1\*</sup> and David A. Dougan<sup>1\*</sup>

6

7

8 <sup>1</sup>Department of Biochemistry and Genetics, La Trobe Institute for Molecular Science, La Trobe  
9 University, Melbourne, Victoria, 3086, Australia.

10 <sup>2</sup>Department of Protein Evolution, Max-Planck-Institute for Developmental Biology, Tübingen,  
11 Germany.

12 <sup>3</sup>Department of Science and Environment, Roskilde University, DK-4000, Denmark.

13 \*These authors contributed equally to this work

14

15 <sup>f</sup>Present address: Department of Radiation Oncology, Stanford University School of Medicine,  
16 Stanford, CA 94305, USA.

17 <sup>§</sup>Present address: Department of Immunology and Pathology, Monash University, Melbourne, 3004,  
18 Victoria, Australia

19 <sup>†</sup>Present address: Institute of Evolutionary Medicine, University of Zurich, Zurich, Switzerland.

20

21

22 Correspondence and requests for materials should be addressed to K.N.T. (email:  
23 [k.truscott@latrobe.edu.au](mailto:k.truscott@latrobe.edu.au)) or D.A.D. (email: [d.dougan@latrobe.edu.au](mailto:d.dougan@latrobe.edu.au)).

24

40922693-file00.docx

25

## 26 **Summary**

27 Polymerase  $\delta$  interacting protein of 38 kDa (PDIP38) was originally identified in a yeast two hybrid  
28 screen as an interacting protein of DNA polymerase delta, more than a decade ago. Since this time  
29 several subcellular locations have been reported and hence its function remains controversial. Our  
30 current understanding of PDIP38 function has also been hampered by a lack of detailed biochemical  
31 or structural analysis of this protein. Here we show, that human PDIP38 is directed to the  
32 mitochondrion, where it resides in the matrix compartment, together with its partner protein CLPX.  
33 PDIP38 is a bifunctional protein, composed of two conserved domains separated by an  $\alpha$ -helical  
34 hinge region (or middle domain). The N-terminal (YccV-like) domain of PDIP38 forms an SH3-like  
35  $\beta$ -barrel, which interacts specifically with CLPX, via the adaptor docking loop within the N-  
36 terminal Zinc binding domain (ZBD) of CLPX. In contrast, the C-terminal (DUF525) domain forms  
37 an Immunoglobulin-like  $\beta$ -sandwich fold, which contains a highly conserved hydrophobic groove.  
38 Based on the physicochemical properties of this groove, we propose that PDIP38 is required for the  
39 recognition (and delivery to CLPXP) of proteins bearing specific hydrophobic degrons, potentially  
40 located at the termini of the target protein. Significantly, interaction with PDIP38 stabilizes the  
41 steady state levels of CLPX *in vivo*. Consistent with these data, PDIP38 inhibits the LONM-  
42 mediated turnover of CLPX *in vitro*. Collectively, our findings shed new light on the mechanistic  
43 and functional significance of PDIP38, indicating that in contrast to its initial identification as a  
44 nuclear protein, PDIP38 is a *bona fide* mitochondrial adaptor protein for the CLPXP protease.

45

46

47 **Keywords:** PDIP38, CLPX, adaptor, structure, mitochondrial proteostasis.

40922693-file00.docx

## 48 **Introduction**

49 Polymerase  $\delta$  interacting protein of 38 kDa (PDIP38, also known as POLDIP2 and mitogenin) was  
50 originally discovered through a yeast two hybrid screen, as a p50 (subunit of DNA polymerase delta)  
51 interacting protein<sup>1</sup>. Subsequently, PDIP38 has been identified in the nucleus, where it is proposed  
52 to play a role in DNA repair<sup>2-5</sup>. It has also been located in the cytoplasm and the plasma membrane  
53<sup>2,4-6</sup> where it has been implicated in a variety of cellular functions, ranging from cell proliferation<sup>7</sup>,  
54 to regulation of the extracellular matrix<sup>8</sup>, oxidative signalling and cell migration<sup>9</sup>, Tau  
55 aggregation<sup>10</sup> and cancer<sup>11</sup>. Despite the extensive repertoire of putative physiological functions for  
56 PDIP38, few of the proposed interactions have been biochemically validated. Indeed, in contrast to  
57 its proposed role in the nucleus, there is growing evidence to suggest that PDIP38, through its  
58 interaction with CLPX, forms part of the mitochondrial protein homeostasis (proteostasis) network  
59<sup>12-14</sup>. However, currently little is known about the structure or function of PDIP38, its mechanism of  
60 action or its role in mitochondrial proteostasis.

61

62 Proteostasis involves the constant surveillance and maintenance of the proteome, from a proteins  
63 synthesis on a ribosome, through its folding and transport to the correct subcellular location and  
64 ultimately its removal from the cell in a timely manner<sup>15</sup>. This process is maintained by a network  
65 of proteins, which includes proteolytic machines and their associated cofactors that are responsible  
66 for the timely recognition and removal of damaged or unwanted proteins. In eukaryotes, the major  
67 non-lysosomal degradation pathway is mediated by the Ubiquitin (Ub) Proteasome System (UPS),  
68 which is responsible for the recognition (by a Ub ligase) of specific degradation signals (degrons)  
69 within a target protein, resulting in the conjugation of Ub (usually in the form of polyUb) to a Lys  
70 residue within the target. Ultimately, the tagged protein is processed into short peptides by a single  
71 ATP-dependent protease (the 26S proteasome). The broad specificity of this system is achieved  
72 through the large number of Ub ligases (~1,000 in mammals), which mediate recognition of  
73 different substrates. In contrast to the mammalian cytosol, protein degradation in eukaryotic  
74 organelles (similar to that in the bacterial cytosol) is mediated by several different ATP-dependent  
75 proteases, which function together with a handful of specialised adaptor proteins to enhance their  
76 substrate specificity<sup>16-18</sup>. Collectively these machines, regardless of their subcellular localisation,  
77 are referred to as AAA+ (ATPases associated with a variety of cellular activities) proteases<sup>19-22</sup> as  
78 they are generally composed of two components, an unfoldase component belonging to the AAA+  
79 superfamily and a peptidase component. In human mitochondria, five different AAA+ proteases  
80 have been discovered, two soluble matrix proteases; CLPXP (composed of two separate  
81 components; an unfoldase component CLPX and the peptidase component CLPP) and LONM (also  
82 known as LONP1) and three membrane bound proteases; an *intermembrane space*-AAA (*i*-AAA)

40922693-file00.docx

83 protease and two forms of *matrix*-AAA (*m*-AAA) protease<sup>23</sup>. Although LONM is considered to be  
84 the principal matrix quality control protease<sup>24-27</sup> there is growing evidence that CLPXP also plays a  
85 crucial role in mitochondrial proteostasis, contributing to heme regulation<sup>28-30</sup>, mitoribosomal  
86 assembly<sup>31</sup> and the selective turnover of ROS-damaged subunits of Complex I<sup>32</sup>. Consistently,  
87 mutations in CLPP that cause Perrault syndrome 3 are linked to mitochondrial dysfunction<sup>33-35</sup>.  
88 Moreover, targeted dysregulation of mitochondrial CLPP was also recently demonstrated to be  
89 lethal to specific cancer cells<sup>36,37</sup>. Despite the emerging importance of this protease complex in  
90 human mitochondria, our understanding of this machine and its mechanism of substrate recognition  
91 is largely based on homologous prokaryotic systems.

92

93 Here we show, that human PDIP38 is imported into isolated mitochondria, where it co-localizes  
94 with its partner proteins CLPX (and CLPP) in the matrix compartment. Importantly, PDIP38 does  
95 not trigger dissociation of the CLPXP complex, but rather we propose that PDIP38 is a  
96 mitochondrial adaptor protein for the AAA+ protease, CLPXP. Consistent with its role as a CLPX-  
97 adaptor protein, the structure of PDIP38 is composed of two domains, an N-terminal “YccV-like”  
98 domain which docks to an adaptor binding loop within the ZBD of CLPX, and a C-terminal  
99 DUF525-domain which forms an immunoglobulin-like fold bearing a putative substrate-binding  
100 groove. Significantly, the putative substrate-binding groove is lined with conserved hydrophobic  
101 residues and capped (at both ends) with conserved charged residues (basic at one end and acidic at  
102 the other). We speculate that, this groove is responsible for the specific recognition of short  
103 hydrophobic degrons, potentially located at the termini of a protein. Intriguingly, both domains have  
104 been found to recur throughout evolution (in bacteria, plants and humans), in select components of  
105 diverse protein degradation pathways. The YccV domain has been identified in bacterial (HspQ)  
106 and plant (ClpF) proteins, which appears to act as an anti-adaptor of the N-recogin, ClpS and  
107 hence regulates the recognition and turnover of N-degron bearing substrates<sup>38,39</sup>. In contrast, the  
108 ApaG domain has been identified in Fbox-only proteins such as Fbx3, where it is proposed to act as  
109 a substrate recognition component. Consistent with this premise, we show that PDIP38 inhibits the  
110 LONM-mediated turnover of CLPX *in vitro* and stabilizes the steady state levels of CLPX *in vivo*.  
111 As such, PDIP38 regulates CLPXP activity, both directly (through the potential delivery of specific  
112 substrates to CLPX for degradation by CLPP) and indirectly (through inhibition of the LONM-  
113 mediated turnover of CLPX *in vivo*).

114

40922693-file00.docx

## 115 RESULTS

### 116 *Human PDIP38 is a matrix localised mitochondrial protein*

117 To date, mammalian PDIP38 has been identified in several subcellular compartments, from the  
118 plasma membrane to the nucleus and the mitochondrion<sup>1,6,12</sup>, and as such its subcellular localisation  
119 is currently controversial. Therefore, to validate the sub-cellular localisation of human PDIP38, we  
120 performed *in vitro* import assays into isolated mitochondria and mitochondrial fractionation  
121 experiments (**Fig. 1**). Consistent with our identification of murine PDIP38 as a mitochondrial  
122 protein<sup>12</sup>, radiolabelled human preprotein (pPDIP38) was imported into isolated mitochondria in a  
123 membrane potential-dependent manner (**Fig. 1a**, compare lanes 5 and 6). Importantly the processed,  
124 mature form of the protein (mPDIP38) was protected from cleavage by Proteinase K (Prot. K),  
125 demonstrating that mPDIP38 was sequestered inside the mitochondrion. Next, we performed a sub-  
126 mitochondrial fractionation of mitochondria isolated from HeLa cells coupled with a protease  
127 protection assays using Prot. K. Consistent with the location of PDIP38 within the mitochondrial  
128 matrix, and similar to a known matrix protein – CLPP, PDIP38 was protected from digestion by  
129 Prot. K in both intact mitochondria (**Fig. 1b**, lanes 1 – 4) and mitoplast (**Fig. 1b**, lanes 5 – 8). As a  
130 control, the outer membrane protein (TOM20) was digested by Prot. K under all conditions, while  
131 the inner membrane protein (TIM23) was completely protected in intact mitochondria but sensitive  
132 in mitoplast (**Fig. 1b**, lanes 5 – 8). Next, having established that human PDIP38 was indeed located  
133 within the mitochondrial matrix we analysed the interaction between CLPX and PDIP38 in human  
134 mitochondria by co-immunoprecipitation (co-IP). Initially, we examined the interaction of  
135 endogenous CLPX (with endogenous PDIP38), using a PDIP38 specific antisera immobilised to  
136 Protein A Sepharose (PAS). Consistent with a specific interaction between PDIP38 and CLPX,  
137 CLPX was only recovered in the presence of anti-PDIP38 (**Fig. 1c**, lane 3 lower panel) and not in  
138 the presence of the pre-immune sera (**Fig. 1c**, lane 2 lower panel). Next, to confirm this interaction  
139 we performed the reverse co-IP, in which the anti-CLPX antisera was immobilised to PAS.  
140 Consistent with the specific IP of CLPX with anti-PDIP38, the IP of CLPX using anti-CLPX  
141 antisera also resulted in the specific co-IP of PDIP38 (**Fig. 1d**, lane 3 lower panel).

142

### 143 *The ZBD of CLPX is sufficient for interaction with PDIP38*

144 Next, to ensure that the interaction observed *in vivo* (between PDIP38 and CLPX) was direct, we  
145 purified both components and examined the interaction *in vitro*. To do so, we generated a GST-  
146 PDIP38 fusion protein in which PDIP38 was fused to the C-terminus of GST. Following expression  
147 of GST-PDIP38, a soluble lysate (bearing overexpressed GST-PDIP38) was applied to Ni-NTA  
148 agarose beads (either lacking or containing immobilised His<sub>10</sub>-tagged CLPX (H<sub>10</sub>CLPX, see **Fig.**

40922693-file00.docx

149 **2a**). Following incubation of GST-PDIP38 with the beads, the specifically bound proteins were  
150 eluted from the column with imidazole (**Fig. 2b**, lanes 4 and 7). Consistent with our identification  
151 of PDIP38 as a novel CLPX interacting protein (**Fig. 1**), GST-PDIP38 was only recovered in the  
152 presence of immobilised H<sub>10</sub>CLPX (**Fig. 2b**, lanes 7) and not in the absence of an immobilised  
153 protein (**Fig. 2b**, lanes 4).

154 Next, we asked the question how does the CLPX-PDIP38 complex form? Initially, we speculated  
155 that PDIP38 might be an adaptor protein of human CLPX, and as such would likely bind to an  
156 accessory domain of CLPX, as is the case for several bacterial AAA+ adaptor proteins<sup>16,40-42</sup>.  
157 Interestingly in contrast to bacterial ClpX homologs, human CLPX contains two accessory domains,  
158 an N-terminal C4 type Zinc finger domain (often referred to as a Zinc binding domain (ZBD)) and  
159 an additional domain that is inserted into the AAA module of CLPX, which is unique to eukaryotic  
160 CLPX homologs (termed the E-domain<sup>43</sup>). Therefore, to identify which CLPX domain (or domains)  
161 might be responsible for the interaction with PDIP38, we generated and purified H<sub>10</sub>-tagged  
162 versions of both the ZBD (**Fig. 2a**, ZBD) and the E-domain (**Fig. 2a**, E) of CLPX. These proteins  
163 were then immobilised to Ni-NTA agarose (as described above) and a soluble lysate bearing GST-  
164 PDIP38 was applied to the appropriate columns (**Fig. 2c**, lane 2, 5 and 8). Consistent with the data  
165 above, in which PDIP38 was recovered in the presence of full-length CLPX, PDIP38 was  
166 specifically co-eluted from the column containing immobilised ZBD (**Fig. 2c**, lane 10) and not from  
167 the column containing immobilised E-domain (**Fig. 2c**, lane 7). Collectively these data demonstrate  
168 that PDIP38 interacts specifically with the ZBD of CLPX. Next, we examined the stoichiometry of  
169 the interaction between PDIP38 and the N-domain. To address this question, we purified full-length  
170 PDIP38 (containing an N-terminal H<sub>10</sub>-tag) and monitored complex formation by size exclusion  
171 chromatography, using Superose 12. Both proteins alone formed a monodispersed peak on gel  
172 filtration, PDIP38 (alone) eluted in a single peak (**Fig. 2d**, upper panel), with an apparent molecular  
173 weight of ~ 39 kDa (consistent with a monomeric protein in solution), while in contrast the ZBD of  
174 CLPX (**Fig. 2d**, middle panel) eluted at ~15 ml, (which is consistent with an apparent molecular  
175 weight of ~ 24 kDa and hence likely a homodimer of CLPX<sub>ZBD</sub>). Consistent with the pull-down  
176 (**Fig. 2d**), PDIP38 formed a stable complex with CLPX<sub>ZBD</sub>, which based on the elution volume of  
177 the complex (~13.6 ml, equivalent to ~ 49 kDa) likely forms a heterodimeric complex composed of  
178 one subunit of each protein (**Fig. 2d**, lower panel).

179

### 180 *PDIP38 is composed of two domains – only the NTD is required for interaction with CLPX*

181 Having determined which domain of CLPX is required for interaction with PDIP38, we next  
182 examined the domain structure of PDIP38 with the aim of defining which region or regions in  
183 PDIP38 are required for interaction with the ZBD of CLPX. Initially we used a bioinformatic

40922693-file00.docx

184 approach to determine the domain structure of PDIP38<sup>44</sup>. This analysis revealed that PDIP38 is  
185 composed of two domains, a large YccV-like N-terminal domain (residues 52 – 234) and a smaller  
186 C-terminal domain (residues 235 – 368) of unknown function (DUF525). Intriguingly, both  
187 domains have been identified in proteins that have been implicated in a variety of protein  
188 degradation pathways from bacteria to plants and humans. The YccV-like domain is present in the  
189 F-box protein Fbx21/FbxO21, which was recently demonstrated to form an integral component of  
190 the SCF (Skip-Cullin-Fbox) Ubiquitin (Ub) ligase complex required for the turnover of EID1<sup>45,46</sup>.  
191 This domain was also recently identified in a unique component (termed ClpF), which is proposed  
192 to form part of the Clp protease machinery in the chloroplast of *Arabidopsis thaliana*<sup>38</sup>. In this case,  
193 ClpF was shown to form a binary complex with ClpS1, a putative adaptor protein (or N-recognin)  
194 that is required for the recognition of substrate proteins bearing specific N-degrons<sup>47,48</sup>.  
195 Remarkably, bacterial YccV (recently renamed HspQ) was also shown to regulate protein turnover  
196 via two proteolytic system, activating Lon-mediated turnover and inhibiting ClpS-mediated  
197 degradation of N-degron substrates<sup>39,49</sup>. Based on the bioinformatic analysis of PDIP38, we  
198 initially generated GST-fusion proteins of each domain, however unexpectedly neither fusion  
199 protein was soluble. Therefore, in order to identify a functional boundary of the proposed domains  
200 we performed limited proteolysis of mature PDIP38, using thermolysin (**Fig. 3a**). This approach  
201 revealed that PDIP38 was indeed composed of two stable domains (**Fig. 3a**, f1 and f2). However,  
202 based on the transient appearance of two intermediate fragments (f1' and f2'), these domains are  
203 likely separated by an exposed, flexible linker. To identify the boundary of these two domains we  
204 performed six rounds of Edman degradation on fragment f1 (FLANHD). This defined f1 as the C-  
205 terminal DUF525 domain and identified the boundary of this domain as F157. Armed with this  
206 information we generated two additional GST-fusion proteins, GST-PDIP38<sub>N</sub> (**Fig. 3b**) in which the  
207 N-terminal domain of PDIP38 (residues 52 to 153) was fused to the C-terminus of GST and GST-  
208 PDIP38<sub>C</sub> (see **Fig. 3b**) in which the C-terminal domain of PDIP38 (residues 157 to 368) was fused  
209 to C-terminus of GST (GST-PDIP38<sub>C</sub>). To determine which domain was required for docking to  
210 CLPX we performed a series of pull-down assays, in which H<sub>10</sub>CLPX was immobilised to NiNTA-  
211 agarose beads and then incubated with a bacterial cell lysate containing either overexpressed GST-  
212 PDIP38, GST-PDIP38<sub>N</sub> or GST-PDIP38<sub>C</sub> (**Fig. 3c**, lanes 2, 4 and 6 respectively). As a control, the  
213 different GST-PDIP38 fusion proteins were also incubated with Ni-NTA-agarose beads lacking  
214 immobilised protein (**Fig. 3c**, lanes 3, 5 and 7, respectively). As expected, and consistent with  
215 Figure 2b, full length GST-PDIP38 was specifically eluted from the column containing immobilised  
216 H<sub>10</sub>CLPX (**Fig. 3c**, lanes 2). Significantly, deletion of the N-domain of PDIP38 (GST-PDIP38<sub>C</sub>)  
217 was sufficient to prevent any specific interaction between the two proteins (**Fig. 3c**, compare lanes 6  
218 and 7). Consistent with these results, the N-domain of PDIP38 alone was sufficient for the

40922693-file00.docx

219 interaction with CLPX as the GST-PDIP38<sub>N</sub> fusion was specifically recovered from NiNTA-agarose  
220 beads containing immobilised CLPX (**Fig. 3c**, lanes 4) and not from beads lacking immobilised  
221 protein (**Fig. 3c**, lanes 5). Taken together these results demonstrate that the N-terminal YccV-like  
222 domain of PDIP38 specifically docks to the ZBD of CLPX.

223

224 ***PDIP38 docks to the “adaptor binding” loop within the NTD of CLPX to regulate turnover of a***  
225 ***model substrate***

226 Next, we examined the consequence of PDIP38 docking to CLPX, i.e. is PDIP38 a substrate or an  
227 adaptor protein of CLPX, or does PDIP38 trigger dissociation of the CLXP complex? To  
228 determine if PDIP38 is a substrate of CLXP, we monitored the stability of PDIP38 *in vitro*, in the  
229 presence of active CLXP (**Fig. 4a**). Given that substrate recognition by many Clp-proteases is  
230 generally mediated by degrons located at either the N- or C-termini<sup>50</sup>, we generated an untagged  
231 version of PDIP38, using the Ub-fusion system<sup>51</sup>. As a control, to ensure that human CLXP was  
232 active, we monitored the turnover of the model unfolded protein (casein), a well-characterized  
233 CLPX substrate<sup>12,52</sup>. Significantly, in contrast to the rapid CLXP-mediated turnover of FITC-  
234 casein (**Fig. 4a**, middle panel), the levels of untagged PDIP38 remained unchanged throughout the  
235 time course of the experiment (**Fig. 4a**, upper panel). These data clearly demonstrate that mature  
236 untagged PDIP38 is not a substrate of the CLXP protease, but rather is either an adaptor protein  
237 for human CLXP(P) or alternatively a protein “*switch*” that triggers dissociation of CLPP from the  
238 CLXP complex. In order to address the second possibility and determine if PDIP38 is able to  
239 modulate the specificity of CLXP, we next monitored the CLXP-mediated turnover of FITC-  
240 labelled casein in the absence and presence of PDIP38 (**Fig. 4a**). Significantly, the addition of  
241 PDIP38 exhibited contrasting effects on the turnover of different forms of FITC-casein, specifically  
242 the CLXP-mediated turnover of  $\alpha_{S2}$ casein was inhibited by PDIP38 (**Fig. 4a**, lower panel), in a  
243 concentration-dependent manner (**Supplementary Fig. 1**), while the turnover of  $\kappa$ -casein was  
244 unaffected by the presence of PDIP38 (**Fig. 4a**, lower panel, **Supplementary Fig. 1**, black bars).  
245 Collectively these data suggest that PDIP38 was able to specifically inhibit the turnover of one  
246 substrate without affecting the turnover of another, demonstrating that PDIP38 does not trigger  
247 dissociation of CLPX from CLPP. In addition, PDIP38 itself was not a substrate of the CLXP  
248 machine, suggesting that PDIP38 exhibits *adaptor-like* activity. To further investigate the possibility  
249 that PDIP38 is a CLPX adaptor protein we compared the ZBD of human CLPX with several other  
250 ClpX homologs, from both bacterial and eukaryotic species. In particular we focused on the known  
251 adaptor-docking region (**Fig. 4c**, adaptor binding loop). Despite considerable sequence conservation  
252 across the ZBD of bacterial and eukaryotic homologs, one region of the ZBD – the “*adaptor*  
253 *binding loop*” – diverged. This part of the domain was highly conserved amongst either eukaryotic



40922693-file00.docx

254 (or bacterial) species but poorly conserved across the two kingdoms (**Fig. 4c and 4d**). Therefore,  
255 we hypothesized that this region may have coevolved with a new adaptor protein (i.e. PDIP38). To  
256 test the idea that the “*adaptor binding loop*” within the ZBD of human CLPX is required for  
257 docking to the putative adaptor protein PDIP38, we examined the ability of *Escherichia coli* ClpX  
258 (*ecClpX*) ZBD (*ecZBD*) to interact with human PDIP38 (**Fig. 4b**). Remarkably, in contrast to  
259 human ZBD (**Fig. 4b**, lane 1) which bound to PDIP38, *ecZBD* failed to interact with PDIP38 at all  
260 (**Fig. 4b**, lane 3). Next to confirm that the proposed *adaptor binding loop* was indeed the site of  
261 PDIP38 interaction in human CLPX we replaced the putative adaptor-docking region (residues 120  
262 to 123; SSTR) with AAAA in both full-length CLPX (here referred to as CLPX<sub>4A</sub>) and in the ZBD  
263 of CLPX (here referred to as ZBD<sub>4A</sub>). Consistent with the loss of binding of PDIP38 to *ecZBD*, the  
264 recovery of untagged PDIP38 to either immobilised ZBD<sub>4A</sub> (**Fig. 4e**, lane 3) or CLPX<sub>4A</sub> (**Fig. 4e**,  
265 lane 7) was completely abolished, when compared to wild type ZBD (**Fig. 4e**, lane 1) or CLPX (**Fig.**  
266 **4e**, lane 5). Collectively these data suggest that the “*adaptor binding loop*” within the ZBD of  
267 CLPX performs a conserved function in both bacterial and eukaryotic homologs of CLPX.  
268 Specifically, the ZBD of human CLPX forms a crucial docking platform for interaction with the  
269 putative adaptor protein PDIP38. This interaction prevents the CLPX-mediated turnover of the  
270 model substrate,  $\alpha_{S2}$ -casein, while permitting the turnover of  $\kappa$ -casein (**Fig. 4a**) suggesting that  
271 PDIP38 is a *bona fide* adaptor protein of mitochondrial CLPX.

272

273 Next, in order to determine the physiological function of PDIP38, we took two complementary  
274 approaches. In the first approach, we attempted to isolate PDIP38 interacting proteins. To do so, we  
275 knocked down PDIP38 expression in mammalian (HeLa) cells using siRNA with the aim of  
276 stabilising PDIP38-mediated substrates *in vivo*, before isolating the stabilised interacting proteins  
277 via pull-down. Although the knock down of PDIP38, using the PDIP38-specific siRNA (#22994,  
278 Thermo Fisher) was successful (**Fig. 5a**, middle panel compare lanes 1 – 3 with lanes 4 – 6), this  
279 approach was largely unproductive in identifying specific PDIP38 interacting proteins. Nevertheless,  
280 when analysing the steady state levels of selected mitochondrial proteins in the knock down cells,  
281 we noticed that the levels of CLPX were reduced in HeLa cells transfected with the PDIP38-  
282 specific siRNA (**Fig. 5a**, top panel, lanes 1 – 3) when compared to the levels of CLPX in HeLa cells  
283 transfected with a control siRNA (**Fig. 5a**, lanes 4 – 6). Importantly, this change was specific for  
284 CLPX as the levels of CLPP (**Fig. 5a**, lower panel) and the cross-reactive band (**Fig. 5a**, middle  
285 panel, \*) were unchanged by knock down of PDIP38. To validate these data, we examined the  
286 steady state level of CLPX using two additional PDIP38-specific siRNA’s (s25055 and s25056) in  
287 comparison to an appropriate control siRNA (**Supplementary Fig. 2**). Significantly, the loss of  
288 CLPX (as a result of PDIP38 knock down) was specific, as the steady state levels of two unrelated

40922693-file00.docx

289 proteins (i.e. mitochondrial SDHA or the cytosolic protein, GAPDH) were not affected  
290 (**Supplementary Fig. 2b**, lower panels).

291

292 From these data we speculated that PDIP38, similar to the *ec*ClpA adaptor protein *ec*ClpS (which  
293 protects its cognate unfoldase from auto-catalytic degradation *in vivo*<sup>40</sup>), inhibits the autocatalytic  
294 turnover of CLPX. To test this, we monitored the stability of CLPX *in vitro*, in the presence of  
295 CLPP, with or without the addition of PDIP38. Contrary to the idea that PDIP38 inhibited auto-  
296 catalytic turnover of CLPX, the levels of CLPX (*in vitro*) remained unchanged in the presence of  
297 CLPP. Therefore, we hypothesized that the *in vivo* turnover of CLPX was mediated by an alternate  
298 mitochondrial matrix protease (i.e. LONM) and this turnover could be inhibited by PDIP38. To  
299 examine this possibility, we monitored the LONM-mediated degradation of CLPX *in vitro*, in the  
300 absence and presence of PDIP38 (**Fig. 5b**). Consistent with the idea that the levels of CLPX *in vivo*  
301 are controlled by the presence of PDIP38, CLPX was degraded by LONM *in vitro* (**Fig. 5b**, lanes 2  
302 – 7) with a half-life of ~ 60 min (**Fig. 5c**, open circles). Importantly, the LONM-mediated turnover  
303 of CLPX was inhibited by the addition of PDIP38 (**Fig. 5b**, lanes 8 – 13; **Fig. 5c**, filled circles).  
304 Significantly, the PDIP38-mediated inhibition of LONM was specific to the turnover of CLPX, as  
305 the LONM-mediated degradation of casein was unaffected by the addition of PDIP38  
306 (**Supplementary Fig. 3**). Therefore, the inhibition of CLPX turnover is likely due to PDIP38  
307 shielding the CLPX degron from interaction with LONM, which suggests that the CLPX degron is  
308 located within the ZBD of CLPX. Collectively, these data suggest that in the absence of PDIP38,  
309 the *in vivo* levels of CLPX may be regulated by LONM-mediated degradation.

310

311 Next, in order to better understand how substrate recognition by PDIP38 might occur, we  
312 crystalized mature PDIP38 (residues 52 to 368) and solved its structure by X-ray crystallography to  
313 3.1 Å resolution (refer to Supplementary Table 1 for statistics). Consistent with our biochemical  
314 analysis (see **Fig. 3**), the structure of PDIP38 is composed of two domains, an N-terminal YccV-like  
315 domain (residues 64 to 186) and a C-terminal DUF525 domain (residues 231 to 368), separated by a  
316 short middle domain or linker region (**Fig. 6a**). The N-terminal YccV-like domain forms an anti-  
317 parallel  $\beta$ -sheet structure composed of six  $\beta$ -strands ( $\beta_0$ - $\beta_5$ - $\beta_1$ - $\beta_2$ - $\beta_3$ - $\beta_4$ ), in which strands  $\beta_0$  to  
318  $\beta_4$  are connected by loops and  $\beta_4$  and  $\beta_5$  is connected by a short  $3^{10}$  helix (**Fig. 6b** and  
319 **Supplementary Fig. 4**). In contrast to bacterial YccV (HspQ) homologs, PDIP38 contains a large  
320 insertion between  $\beta_2$  and  $\beta_3$ , which forms an extended  $\beta$ -sheet that interacts with the proximal  
321 sheet of the DUF525 domain. Interestingly, this insertion is also present in other YccV-like proteins  
322 (including Human Fbx21), which lack the DUF525 domain. However, similar to PDIP38, Fbx21  
323 contains an additional domain that is proposed to be involved in substrate-binding. Hence, we

40922693-file00.docx

324 propose that similar to PDIP38, the extended  $\beta 2/\beta 3$  sheet in Fbx21 is likely involved in a stabilising  
325 interaction with an associated substrate binding domain. In addition to the extension of the  $\beta 2/\beta 3$   
326 strands, PDIP38 also contains a unique insertion located between  $\beta 3$  and  $\beta 4$  (residues 143-166).  
327 This insertion is not only exposed (as it was susceptible to partial proteolysis) but is also highly  
328 flexible as it was not visible in the structure, presumably due to disorder. Based on the expected  
329 location of this loop, suspended over the DUF525 domain, we speculate that the L4 loop regulates  
330 substrate binding to the C-terminal domain. The linker region (or middle domain), which connects  
331 the N- and C-terminal domains, is formed by a small N-terminal  $\alpha$ -helix ( $\alpha 1$ ), a two-stranded anti-  
332 parallel  $\beta$ -sheet ( $\beta 6$  and  $\beta 7$ ) and a C-terminal  $\alpha$ -helix ( $\alpha 2$ ). This domain makes extensive contact to  
333 the N-terminal domain, wrapping around the domain, and likely forms a flexible hinge point for  
334 movement of the C-terminal domain and hence delivery of bound cargo to the associated ATPase  
335 component, CLPX. The C-terminal DUF525 domain (residues 231 to 368) forms an  
336 Immunoglobulin-like  $\beta$ -sandwich fold composed of two four-stranded antiparallel  $\beta$ -sheets. The  
337 proximal sheet is composed of  $\beta 8$ - $\beta 9$ - $\beta 10$ - $\beta 13$ , while the distal sheet is composed of strands  $\beta 12$ -  
338  $\beta 11$ - $\beta 14$ - $\beta 15$ . Interestingly, although this domain exhibits only limited amino acid identity (~30%)  
339 with bacterial ApaG proteins and eukaryotic F-box only proteins such as Fbx3, this group of  
340 proteins share considerable structural homology (root-mean-squared deviation (RMSD) of ~1.5 Å.  
341 Consistent with our identification of PDIP38 as a putative substrate delivery factor for  
342 mitochondrial CLPX, Fbx3 forms part of a SCF Ubiquitin ligase complex in which the DUF525  
343 domain is proposed to be involved in substrate recognition<sup>53,54</sup>. Therefore, to gain further insight  
344 into the function PDIP38 we examined the molecular surface of our structure (**Fig. 6c**). From this  
345 analysis we identified a conserved hydrophobic groove, located between the two  $\beta$ -sheets of the C-  
346 terminal domain, which is flanked by conserved charged residues at opposite ends of the groove  
347 (**Fig. 6d**). To determine the significance of this groove we also examined the surface of  
348 *Xanthomonas axonopodis* ApaG (PDB: 2F1E) and human Fbx3 (PDB:5HDW). Significantly,  
349 despite the weak overall sequence similarity across this group of proteins, the physicochemical  
350 properties of this groove are remarkably conserved across all three proteins (**Fig. 6e and 6f**,  
351 **Supplementary Fig. 5**). Indeed, all but one of the 9 hydrophobic residues that line the hydrophobic  
352 pocket and both of the charged residues that flank the groove are absolutely conserved from  
353 bacteria to humans (see **Supplementary Table 2 and Supplementary Fig. 5b**). Furthermore, of the  
354 absolutely conserved residues that found within this domain, approximately half of them are  
355 clustered to the hydrophobic groove. Consistent with the notion that this conserved groove plays an  
356 important role in substrate recognition, Chen and colleagues discovered a small molecule inhibitor

40922693-file00.docx

357 of Fbx3, that docks into the conserved hydrophobic pocket where it is proposed to make a crucial  
358 interaction with the conserved acid residue that caps the groove<sup>55</sup>.

359

360 What type of protein substrates might PDIP38 recognise? One possibility, that would be specific to  
361 the matrix compartment, is the recognition of incompletely or aberrantly processed matrix proteins,  
362 which retain their N-terminal presequence. These presequences are generally enriched in  
363 hydrophobic and basic residues, hence we speculate that PDIP38 might be responsible for the  
364 recognition these incorrectly processed or unprocessed matrix proteins, delivering them to CLPXP  
365 for removal. This role is somewhat similar to that of the *E. coli* ClpX adaptor protein – SspB (which  
366 is responsible for the recognition of incomplete translation products that bear a largely hydrophobic  
367 C-terminal recognition motif known as the SsrA-tag<sup>41,56,57</sup>. An alternate possibility involves the  
368 more general recognition of exposed hydrophobic patches that are found in misfolded proteins that  
369 accumulate in response proteostatic stress. Conversely, PDIP38 may be required for the conditional  
370 recognition of proteins that expose hydrophobic motifs at either their N- or C-termini.

371

372 In summary, we show that PDIP38 is a novel component of the proteostasis network in mammalian  
373 mitochondria. Not only does PDIP38 modulate CLPXP substrate specificity and inhibit the LONM-  
374 mediated turnover of CLPX *in vitro*, but it also stabilises the steady state levels of CLPX *in vivo*. As  
375 such we propose that PDIP38 represents a novel mitochondrial adaptor protein for the CLPXP  
376 protease. Consistently, the atomic structure of PDIP38 revealed that the protein is composed of two  
377 domains separated by an  $\alpha$ -helical hinge. The N-terminal YccV-like domain is crucial for  
378 interaction with the adaptor binding loop within the ZBD of CLPX, while the C-terminal domain  
379 contains a conserved hydrophobic groove which is proposed to facilitate substrate binding and  
380 hence delivery to CLPX. Significantly, the residues that line this hydrophobic groove are highly  
381 conserved across DUF525 containing proteins, from bacteria to humans. Hence, we speculate that  
382 the bacterial PDIP38 homolog (i.e. ApaG) may also play a role in protein turnover. An important  
383 challenge for the future will be the *in vivo* dissection of this system to identify the physiological  
384 substrates of the CLPXP protease that are delivered by PDIP38.

385

## 386 **ACKNOWLEDGEMENTS**

387 This work was supported by an Australian Research Council (ARC) Discovery Project (DP0770013)  
388 to D.A.D and K.N.T., and ARC Future Fellowship to K.N.T. (FT0992033) and an ARC Australian  
389 Research Fellowship to D.A.D (DP110103936). P.R.S. and H.Z were supported by a La Trobe  
390 University Postgraduate Award, E.J.B. was supported by Australian Postgraduate Awards and T.S.

40922693-file00.docx

391 was supported Cooperative Research Centre postgraduate award. We thank Mia Miasari for cloning  
392 of PDIP38<sub>N</sub> and PDIP38<sub>C</sub> into pGEX-4T.

393 **Author contribution:**

394 Conceptualization, D.A.D. and K.N.T.; Methodology, D.A.D., K.N.T. and K.Z.; Investigation,  
395 P.R.S., E.J.B., H.Z., V.J.S., L.J.V., T.S. and K.Z.; Writing – Original Draft, D.A.D., K.N.T. and K.Z.;  
396 Supervision, Project Administration and Funding Acquisition, D.A.D. and K.N.T.

397 **Declaration of interests:**

398 The authors declare no competing interests.

399

400 **References**

- 401 1 Liu, L., Rodriguez-Belmonte, E. M., Mazloum, N., Xie, B. & Lee, M. Y. Identification of a  
402 novel protein, PDIP38, that interacts with the p50 subunit of DNA polymerase delta and  
403 proliferating cell nuclear antigen. *J Biol Chem* **278**, 10041-10047,  
404 doi:10.1074/jbc.M208694200 (2003).
- 405 2 Klaile, E., Kukalev, A., Obrink, B. & Muller, M. M. PDIP38 is a novel mitotic spindle-  
406 associated protein that affects spindle organization and chromosome segregation. *Cell Cycle*  
407 **7**, 3180-3186, doi:10.4161/cc.7.20.6813 (2008).
- 408 3 Tissier, A. *et al.* Crosstalk between replicative and translesional DNA polymerases: PDIP38  
409 interacts directly with Poleta. *DNA Repair (Amst)* **9**, 922-928,  
410 doi:10.1016/j.dnarep.2010.04.010 (2010).
- 411 4 Wong, A. *et al.* PDIP38 is translocated to the spliceosomes/nuclear speckles in response to  
412 UV-induced DNA damage and is required for UV-induced alternative splicing of MDM2.  
413 *Cell Cycle* **12**, 3184-3193, doi:10.4161/cc.26221 (2013).
- 414 5 Xie, B. *et al.* Further characterization of human DNA polymerase delta interacting protein  
415 38. *J Biol Chem* **280**, 22375-22384, doi:10.1074/jbc.M414597200 (2005).
- 416 6 Klaile, E. *et al.* The cell adhesion receptor carcinoembryonic antigen-related cell adhesion  
417 molecule 1 regulates nucleocytoplasmic trafficking of DNA polymerase delta-interacting  
418 protein 38. *J Biol Chem* **282**, 26629-26640, doi:10.1074/jbc.M701807200 (2007).
- 419 7 Arakaki, N. *et al.* Regulation of mitochondrial morphology and cell survival by Mitogenin I  
420 and mitochondrial single-stranded DNA binding protein. *Biochim Biophys Acta* **1760**, 1364-  
421 1372, doi:10.1016/j.bbagen.2006.05.012 (2006).
- 422 8 Sutliff, R. L. *et al.* Polymerase delta interacting protein 2 sustains vascular structure and  
423 function. *Arterioscler Thromb Vasc Biol* **33**, 2154-2161,  
424 doi:10.1161/ATVBAHA.113.301913 (2013).
- 425 9 Lyle, A. N. *et al.* Poldip2, a novel regulator of Nox4 and cytoskeletal integrity in vascular  
426 smooth muscle cells. *Circ Res* **105**, 249-259, doi:10.1161/CIRCRESAHA.109.193722  
427 (2009).

40922693-file00.docx

- 428 10 Kim, Y. *et al.* Essential role of POLDIP2 in Tau aggregation and neurotoxicity via  
429 autophagy/proteasome inhibition. *Biochem Biophys Res Commun* **462**, 112-118,  
430 doi:10.1016/j.bbrc.2015.04.084 (2015).
- 431 11 Grinchuk, O. V., Motakis, E. & Kuznetsov, V. A. Complex sense-antisense architecture of  
432 TNFAIP1/POLDIP2 on 17q11.2 represents a novel transcriptional structural-functional gene  
433 module involved in breast cancer progression. *BMC Genomics* **11 Suppl 1**, S9,  
434 doi:10.1186/1471-2164-11-S1-S9 (2010).
- 435 12 Lowth, B. R. *et al.* Substrate recognition and processing by a Walker B mutant of the human  
436 mitochondrial AAA+ protein CLPX. *J Struct Biol* **179**, 193-201,  
437 doi:10.1016/j.jsb.2012.06.001 (2012).
- 438 13 Cheng, X. *et al.* PDIP38 associates with proteins constituting the mitochondrial DNA  
439 nucleoid. *J Biochem* **138**, 673-678, doi:10.1093/jb/mvi169 (2005).
- 440 14 Paredes, F. *et al.* Poldip2 is an oxygen-sensitive protein that controls PDH and alphaKGDH  
441 lipoylation and activation to support metabolic adaptation in hypoxia and cancer. *Proc Natl*  
442 *Acad Sci U S A* **115**, 1789-1794, doi:10.1073/pnas.1720693115 (2018).
- 443 15 Sala, A. J., Bott, L. C. & Morimoto, R. I. Shaping proteostasis at the cellular, tissue, and  
444 organismal level. *J Cell Biol* **216**, 1231-1241, doi:10.1083/jcb.201612111 (2017).
- 445 16 Kirstein, J., Moliere, N., Dougan, D. A. & Turgay, K. Adapting the machine: adaptor  
446 proteins for Hsp100/Clp and AAA+ proteases. *Nat Rev Microbiol* **7**, 589-599,  
447 doi:10.1038/nrmicro2185 (2009).
- 448 17 Nishimura, K. & van Wijk, K. J. Organization, function and substrates of the essential Clp  
449 protease system in plastids. *Biochim Biophys Acta* **1847**, 915-930,  
450 doi:10.1016/j.bbabi.2014.11.012 (2015).
- 451 18 Varshavsky, A. The N-end rule pathway and regulation by proteolysis. *Protein Sci* **20**, 1298-  
452 1345, doi:10.1002/pro.666 (2011).
- 453 19 Gur, E., Ottofueling, R. & Dougan, D. A. Machines of destruction - AAA+ proteases and the  
454 adaptors that control them. *Subcell Biochem* **66**, 3-33, doi:10.1007/978-94-007-5940-4\_1  
455 (2013).
- 456 20 Olivares, A. O., Baker, T. A. & Sauer, R. T. Mechanical Protein Unfolding and Degradation.  
457 *Annu Rev Physiol* **80**, 413-429, doi:10.1146/annurev-physiol-021317-121303 (2018).
- 458 21 Striebel, F., Kress, W. & Weber-Ban, E. Controlled destruction: AAA+ ATPases in protein  
459 degradation from bacteria to eukaryotes. *Curr Opin Struct Biol* **19**, 209-217,  
460 doi:10.1016/j.sbi.2009.02.006 (2009).
- 461 22 Yu, H. & Matouschek, A. Recognition of Client Proteins by the Proteasome. *Annu Rev*  
462 *Biophys* **46**, 149-173, doi:10.1146/annurev-biophys-070816-033719 (2017).
- 463 23 Glynn, S. E. Multifunctional Mitochondrial AAA Proteases. *Front Mol Biosci* **4**, 34,  
464 doi:10.3389/fmolb.2017.00034 (2017).
- 465 24 Bezawork-Geleta, A., Brodie, E. J., Dougan, D. A. & Truscott, K. N. LON is the master  
466 protease that protects against protein aggregation in human mitochondria through direct  
467 degradation of misfolded proteins. *Sci Rep* **5**, 17397, doi:10.1038/srep17397 (2015).

40922693-file00.docx

- 468 25 Bota, D. A. & Davies, K. J. Lon protease preferentially degrades oxidized mitochondrial  
469 aconitase by an ATP-stimulated mechanism. *Nat Cell Biol* **4**, 674-680, doi:10.1038/ncb836  
470 (2002).
- 471 26 Fukuda, R. *et al.* HIF-1 regulates cytochrome oxidase subunits to optimize efficiency of  
472 respiration in hypoxic cells. *Cell* **129**, 111-122, doi:10.1016/j.cell.2007.01.047 (2007).
- 473 27 Tian, Q. *et al.* Lon peptidase 1 (LONP1)-dependent breakdown of mitochondrial 5-  
474 aminolevulinic acid synthase protein by heme in human liver cells. *J Biol Chem* **286**, 26424-  
475 26430, doi:10.1074/jbc.M110.215772 (2011).
- 476 28 Kubota, Y. *et al.* Novel Mechanisms for Heme-dependent Degradation of ALAS1 Protein as  
477 a Component of Negative Feedback Regulation of Heme Biosynthesis. *J Biol Chem* **291**,  
478 20516-20529, doi:10.1074/jbc.M116.719161 (2016).
- 479 29 Yien, Y. Y. *et al.* Mutation in human CLPX elevates levels of delta-aminolevulinic acid synthase  
480 and protoporphyrin IX to promote erythropoietic protoporphyria. *Proc Natl Acad Sci U S A*  
481 **114**, E8045-E8052, doi:10.1073/pnas.1700632114 (2017).
- 482 30 Kardon, J. R. *et al.* Mitochondrial ClpX Activates a Key Enzyme for Heme Biosynthesis  
483 and Erythropoiesis. *Cell* **161**, 858-867, doi:10.1016/j.cell.2015.04.017 (2015).
- 484 31 Szczepanowska, K. *et al.* CLPP coordinates mitochondrial assembly through the regulation  
485 of ERAL1 levels. *EMBO J* **35**, 2566-2583, doi:10.15252/embj.201694253 (2016).
- 486 32 Pryde, K. R., Taanman, J. W. & Schapira, A. H. A LON-ClpP Proteolytic Axis Degrades  
487 Complex I to Extinguish ROS Production in Depolarized Mitochondria. *Cell Rep* **17**, 2522-  
488 2531, doi:10.1016/j.celrep.2016.11.027 (2016).
- 489 33 Brodie, E. J., Zhan, H., Saiyed, T., Truscott, K. N. & Dougan, D. A. Perrault syndrome type  
490 3 caused by diverse molecular defects in CLPP. *Sci Rep* **8**, 12862, doi:10.1038/s41598-018-  
491 30311-1 (2018).
- 492 34 Jenkinson, E. M. *et al.* Perrault syndrome is caused by recessive mutations in CLPP,  
493 encoding a mitochondrial ATP-dependent chambered protease. *Am J Hum Genet* **92**, 605-  
494 613, doi:10.1016/j.ajhg.2013.02.013 (2013).
- 495 35 Gispert, S. *et al.* Loss of mitochondrial peptidase Clpp leads to infertility, hearing loss plus  
496 growth retardation via accumulation of CLPX, mtDNA and inflammatory factors. *Hum Mol*  
497 *Genet* **22**, 4871-4887, doi:10.1093/hmg/ddt338 (2013).
- 498 36 Ishizawa, J. *et al.* Mitochondrial ClpP-Mediated Proteolysis Induces Selective Cancer Cell  
499 Lethality. *Cancer Cell* **35**, 721-737 e729, doi:10.1016/j.ccell.2019.03.014 (2019).
- 500 37 Wang, S. & Dougan, D. A. The Direct Molecular Target for Imipridone ONC201 Is Finally  
501 Established. *Cancer Cell* **35**, 707-708, doi:10.1016/j.ccell.2019.04.010 (2019).
- 502 38 Nishimura, K. *et al.* Discovery of a Unique Clp Component, ClpF, in Chloroplasts: A  
503 Proposed Binary ClpF-ClpS1 Adaptor Complex Functions in Substrate Recognition and  
504 Delivery. *Plant Cell* **27**, 2677-2691, doi:10.1105/tpc.15.00574 (2015).
- 505 39 Yeom, J. & Groisman, E. A. Activator of one protease transforms into inhibitor of another in  
506 response to nutritional signals. *Genes Dev*, doi:10.1101/gad.325241.119 (2019).

40922693-file00.docx

- 507 40 Dougan, D. A., Reid, B. G., Horwich, A. L. & Bukau, B. ClpS, a substrate modulator of the  
508 ClpAP machine. *Mol Cell* **9**, 673-683 (2002).
- 509 41 Dougan, D. A., Weber-Ban, E. & Bukau, B. Targeted delivery of an *ssrA*-tagged substrate by  
510 the adaptor protein SspB to its cognate AAA+ protein ClpX. *Mol Cell* **12**, 373-380 (2003).
- 511 42 Wojtyra, U. A., Thibault, G., Tuite, A. & Houry, W. A. The N-terminal zinc binding domain  
512 of ClpX is a dimerization domain that modulates the chaperone function. *J Biol Chem* **278**,  
513 48981-48990 (2003).
- 514 43 Truscott, K. N., Lowth, B. R., Strack, P. R. & Dougan, D. A. Diverse functions of  
515 mitochondrial AAA+ proteins: protein activation, disaggregation, and degradation. *Biochem*  
516 *Cell Biol* **88**, 97-108, doi:10.1139/o09-167 (2010).
- 517 44 Mitchell, A. L. *et al.* InterPro in 2019: improving coverage, classification and access to  
518 protein sequence annotations. *Nucleic Acids Res* **47**, D351-D360, doi:10.1093/nar/gky1100  
519 (2019).
- 520 45 Watanabe, K., Yumimoto, K. & Nakayama, K. I. FBXO21 mediates the ubiquitylation and  
521 proteasomal degradation of EID1. *Genes Cells* **20**, 667-674, doi:10.1111/gtc.12260 (2015).
- 522 46 Zhang, C. *et al.* Peptidic degron in EID1 is recognized by an SCF E3 ligase complex  
523 containing the orphan F-box protein FBXO21. *Proc Natl Acad Sci U S A* **112**, 15372-15377,  
524 doi:10.1073/pnas.1522006112 (2015).
- 525 47 Montandon, C., Dougan, D. A. & van Wijk, K. J. N-degron specificity of chloroplast ClpS1  
526 in plants. *FEBS Lett* **593**, 962-970, doi:10.1002/1873-3468.13378 (2019).
- 527 48 Erbse, A. *et al.* ClpS is an essential component of the N-end rule pathway in *Escherichia coli*.  
528 *Nature* **439**, 753-756, doi:10.1038/nature04412 (2006).
- 529 49 Puri, N. & Karzai, A. W. HspQ Functions as a Unique Specificity-Enhancing Factor for the  
530 AAA+ Lon Protease. *Mol Cell* **66**, 672-683 e674, doi:10.1016/j.molcel.2017.05.016 (2017).
- 531 50 Varshavsky, A. N-degron and C-degron pathways of protein degradation. *Proc Natl Acad Sci*  
532 *U S A* **116**, 358-366, doi:10.1073/pnas.1816596116 (2019).
- 533 51 Catanzariti, A. M., Soboleva, T. A., Jans, D. A., Board, P. G. & Baker, R. T. An efficient  
534 system for high-level expression and easy purification of authentic recombinant proteins.  
535 *Protein Sci* **13**, 1331-1339, doi:10.1110/ps.04618904 (2004).
- 536 52 Kang, S. G. *et al.* Functional proteolytic complexes of the human mitochondrial ATP-  
537 dependent protease, hClpXP. *J Biol Chem* **277**, 21095-21102, doi:10.1074/jbc.M201642200  
538 (2002).
- 539 53 Krzysiak, T. C., Chen, B. B., Lear, T., Mallampalli, R. K. & Gronenborn, A. M. Crystal  
540 structure and interaction studies of the human FBx3 ApaG domain. *FEBS J* **283**, 2091-  
541 2101, doi:10.1111/febs.13721 (2016).
- 542 54 Shima, Y. *et al.* PML activates transcription by protecting HIPK2 and p300 from SCFFbx3-  
543 mediated degradation. *Mol Cell Biol* **28**, 7126-7138, doi:10.1128/MCB.00897-08 (2008).
- 544 55 Mallampalli, R. K. *et al.* Targeting F box protein Fbxo3 to control cytokine-driven  
545 inflammation. *J Immunol* **191**, 5247-5255, doi:10.4049/jimmunol.1300456 (2013).



40922693-file00.docx

- 546 56 Levchenko, I., Grant, R. A., Wah, D. A., Sauer, R. T. & Baker, T. A. Structure of a delivery  
547 protein for an AAA+ protease in complex with a peptide degradation tag. *Mol Cell* **12**, 365-  
548 372 (2003).
- 549 57 Levchenko, I., Seidel, M., Sauer, R. T. & Baker, T. A. A specificity-enhancing factor for the  
550 ClpXP degradation machine. *Science* **289**, 2354-2356 (2000).
- 551 58 Park, E. Y. *et al.* Structural basis of SspB-tail recognition by the zinc binding domain of  
552 ClpX. *J Mol Biol* **367**, 514-526, doi:10.1016/j.jmb.2007.01.003 (2007).
- 553 59 Truscott, K. N. *et al.* A presequence- and voltage-sensitive channel of the mitochondrial  
554 preprotein translocase formed by Tim23. *Nat Struct Biol* **8**, 1074-1082 (2001).
- 555 60 Zheng, L., Baumann, U. & Reymond, J. L. An efficient one-step site-directed and site-  
556 saturation mutagenesis protocol. *Nucleic Acids Res* **32**, e115, doi:10.1093/nar/gnh110 (2004).
- 557 61 Ninnis, R. L., Spall, S. K., Talbo, G. H., Truscott, K. N. & Dougan, D. A. Modification of  
558 PATase by L/F-transferase generates a ClpS-dependent N-end rule substrate in *Escherichia*  
559 *coli*. *EMBO J* **28**, 1732-1744, doi:10.1038/emboj.2009.134 (2009).
- 560 62 Schagger, H. & von Jagow, G. Tricine-sodium dodecyl sulfate-polyacrylamide gel  
561 electrophoresis for the separation of proteins in the range from 1 to 100 kDa. *Anal Biochem*  
562 **166**, 368-379 (1987).
- 563 63 Geissler, A. *et al.* The mitochondrial presequence translocase: an essential role of Tim50 in  
564 directing preproteins to the import channel. *Cell* **111**, 507-518 (2002).
- 565 64 Bezawork-Geleta, A., Saiyed, T., Dougan, D. A. & Truscott, K. N. Mitochondrial matrix  
566 proteostasis is linked to hereditary paraganglioma: LON-mediated turnover of the human  
567 flavinylation factor SDH5 is regulated by its interaction with SDHA. *FASEB J* **28**, 1794-  
568 1804, doi:10.1096/fj.13-242420 (2014).
- 569 65 Stojanovski, D., Pfanner, N. & Wiedemann, N. Import of proteins into mitochondria.  
570 *Methods Cell Biol* **80**, 783-806, doi:10.1016/S0091-679X(06)80036-1 (2007).
- 571 66 Kabsch, W. Integration, scaling, space-group assignment and post-refinement. *Acta*  
572 *Crystallographica Section D* **66**, 133-144, doi:doi:10.1107/S0907444909047374 (2010).
- 573 67 Kabsch, W. XDS. *Acta Crystallographica Section D* **66**, 125-132,  
574 doi:doi:10.1107/S0907444909047337 (2010).
- 575 68 Afonine, P. V. *et al.* Joint X-ray and neutron refinement with phenix.refine. *Acta Crystallogr*  
576 *D Biol Crystallogr* **66**, 1153-1163, doi:10.1107/S0907444910026582 (2010).  
577

## 578 **Figure Legends**

579 **Figure 1. Human PDIP38 is imported into mitochondrial where it interacts with CLPX.**

580 **a.** Import of [<sup>35</sup>S]-labelled PDIP38 preprotein into mitochondria isolated from HeLa cells, in the  
581 presence or absence of a membrane potential ( $\Delta\psi$ ) as indicated, treated with (lanes 7 – 12) or  
582 without (lanes 1 – 6) proteinase K (Prot. K). Samples were separated by 15% Tris-glycine SDS-  
583 PAGE and analysed by digital autoradiography. **b.** Mitochondria were incubated, either in an

40922693-file00.docx

584 osmotic buffer (lanes 1 – 4), isotonic buffer (Swelling) to rupture the outer membrane (lanes 5 – 8)  
585 or buffer containing Triton X-100 (lanes 9 – 12), in the absence (lanes 1, 5 and 9) or presence (lanes  
586 2 – 4, 6 – 8 and 10 – 12) of Prot. K for the indicated time. Samples were separated by 15% Tris-  
587 glycine SDS-PAGE and subjected to immunoblotting with the appropriate antisera to visualize  
588 endogenous proteins. \*, non-specific cross-reactive protein in PDIP38 antisera **c.** Specific  
589 immunoprecipitation of endogenous PDIP38 from detergent solubilized mitochondria using anti-  
590 PDIP38 polyclonal antibodies showing co-immunoprecipitation of endogenous CLPX. The input  
591 represents 50% of total mitochondrial lysate subjected to IP. **d.** Specific immunoprecipitation of  
592 endogenous CLPX from detergent solubilized mitochondria using anti-CLPX polyclonal antibodies  
593 showing co-immunoprecipitation of endogenous PDIP38. The input represents 50% of total  
594 mitochondrial lysate subjected to IP.

595

596 **Figure 2. The interaction between PDIP38 and CLPX is mediated by the ZBD of CLPX. a.**

597 Cartoon representation of human CLPX domain structure. **b.** Coomassie stained 16.5% Tricine-  
598 buffered SDS-PAGE of PDIP38 pull-down from *E. coli* lysate expressing recombinant GST-PDIP38  
599 using bead immobilised H<sub>10</sub>CLPX (CLPX) relative to beads only (control). T, total *E. coli* lysate  
600 with expressed GST-PDIP38; U, unbound fraction; E, eluted fraction. **c.** Coomassie-stained 16.5%  
601 Tricine-buffered SDS-PAGE of PDIP38 pull-down from *E. coli* lysate expressing recombinant  
602 GST-PDIP38 using bead immobilised H<sub>10</sub>CLPX E-domain (CLPX<sub>E</sub>) and H<sub>10</sub>CLPX Zinc binding  
603 domain (CLPX<sub>ZBD</sub>) relative to beads only (control). T, total lysate expressing GST-PDIP38; U,  
604 unbound fraction; E, eluted fraction. For comparison purified recombinant CLPX<sub>E</sub> (lane 11),  
605 CLPX<sub>ZBD</sub> (lane 12) and GST-PDIP38 (lane 13) are shown. **d.** Complex formation of PDIP38 and  
606 CLPX<sub>ZBD</sub> was monitored by size exclusion chromatography (SEC) using a Superose 12 column.  
607 Elution profiles of PDIP38 (top panel), CLPX<sub>ZBD</sub> (middle panel) or PDIP38 in the presence of  
608 CLPX<sub>ZBD</sub> (bottom panel) were measured at 280 nm (A<sub>280</sub>). Arrows indicate the peak elution volume  
609 of Albumin (67 kDa), Ovalbumin (43 kDa), chymotrypsin A (25 kDa) and Ribonuclease (13.7 kDa).

610

611 **Figure 3. The N-terminal domain of PDIP38 interacts with CLPX.**

612 **a.** Limited proteolysis of native His<sub>10</sub>-tagged PDIP38 using thermolysin. Samples were analyzed by  
613 Coomassie stained 16.5% Tricine-buffered SDS-PAGE. \*, thermolysin. f1, f1', f2, f2', fragments of  
614 PDIP38. **b.** Schematic representation of GST-PDIP38 fusion constructs. Preprotein numbering is  
615 used. **c.** *In vitro* pull-down using Ni-NTA agarose with (lanes 2, 4 and 6) or without (lanes 3, 5 and  
616 7) purified immobilised H<sub>10</sub>CLPX, incubated with *E. coli* lysate expressing GST-PDIP38 (lanes 2 –  
617 3), GST-PDIP38<sub>N</sub> (lanes 4 – 5) or GST-PDIP38<sub>C</sub> (lanes 6 – 7). Eluted fractions are shown with

40922693-file00.docx

618 samples analyzed by Coomassie Brilliant Blue (CBB) staining or immunoblotting (with anti-GST)  
619 following separation by SDS-PAGE. As a control, purified H<sub>10</sub>CLPX (lane 1) is shown.

620

621 **Figure 4. PDIP38 inhibits the CLXP-mediated degradation of a model substrate via adaptor-**  
622 **like docking to CLPX<sub>ZBD</sub>**

623 **a.** *In vitro* degradation of FITC-labelled casein by CLXP protease in the absence and presence of  
624 2.4 μM untagged PDIP38. Samples were separated by SDS-PAGE and analysed by fluorescence  
625 detection (FITC-casein) then CBB staining (PDIP38). **b.** *In vitro* pull-down, in which purified  
626 human (lanes 1 – 2) or *E. coli* (lanes 3 – 4) ZBD was immobilised to Ni-NTA agarose beads and  
627 incubated with (lanes 1 and 3) or without (lanes 2 and 4) an *E. coli* lysate expressing GST-PDIP38.  
628 Eluted fractions are shown with samples analysed by Coomassie Brilliant Blue (CBB) staining. **c.**  
629 Amino acid sequence alignment of eukaryotic and prokaryotic CLPX homologs showing the ZBD  
630 only. The *adaptor binding loop* in prokaryotic ClpX homologs is highlighted in the boxed section.  
631 ClpX sequences are *Homo sapiens* (O76031); *Mus musculus* (Q9JHS4); *Bovine* (F1N155); *Danio*  
632 *rerio* (Q66HW5), *Drosophila melanogaster* (Q9VDS7), *Escherichia coli* (P0A6H1), *Caulobacter*  
633 *crenscentus* (POCAU2), *Mycobacterium tuberculosis* (P9WPB9) and *Bacillus subtilis* (P50866). **d.**  
634 Ribbon diagram of *E. coli* CLPX<sub>ZBD</sub> (PDB: 2DS6<sup>58</sup>, blue) overlaid with a model of the human  
635 CLPX<sub>ZBD</sub> (red) highlighting the position of the putative adaptor-binding loop in human CLPX  
636 (circled). The space-filling model of *E. coli* ClpX N-domain is also shown in light blue. **e.** *In vitro*  
637 pull-down, in which purified wild type (lanes 1 – 2) or mutant (lanes 3 – 4) ZBD and wild type  
638 (lanes 5 – 6) or mutant (lanes 7 – 8) human H<sub>10</sub>CLPX was immobilised to Ni-NTA agarose beads  
639 and incubated with (lanes 1, 3, 5 and 7) or without (lanes 2, 4 and 6) an *E. coli* lysate expressing  
640 untagged PDIP38. Eluted proteins were separated by SDS-PAGE and visualized by Coomassie  
641 Brilliant Blue (CBB) staining.

642

643 **Figure 5. PDIP38 stabilises CLPX protecting it from LONM-mediated degradation.**

644 **a.** Representative immunoblots illustrating the steady state levels of CLPX (upper gel strip),  
645 PDIP38 (middle gel strip) and CLPP (lower gel strip) in PDIP38-depleted HeLa cells (lanes 1 – 3)  
646 relative to control HeLa cells (lanes 4 – 6). Samples were collected at the indicated times post-  
647 transfection of either Silencer Select siRNA (22994) targeting PDIP38 or a negative control siRNA  
648 (control). Proteins were separated by 16.5% Tris-Tricine SDS-PAGE. \*, non-specific cross-reactive  
649 protein in PDIP38 antisera. The lower panel shows the quantitation of CLPX levels from three  
650 independent experiments, in PDIP38 depleted HeLa cells (grey bars) in comparison a negative  
651 control siRNA (white bars). Error bars represent the standard error of the mean (S.E.M.) of at least

40922693-file00.docx

652 three independent experiments. **b.** *In vitro* degradation of CLPX by LONM<sub>6</sub> protease (400 nM) in  
653 the absence or presence of 1 μM PDIP38. Samples were separated by 10% Tris-Tricine SDS-PAGE  
654 and analysed by CBB staining. \* LONM impurity. **c.** Quantitation of *in vitro* degradation of CLPX  
655 by LONM<sub>6</sub> (400 nM) in the absence (open symbols) or presence (closed symbols) of untagged  
656 PDIP38. Samples were separated by SDS-PAGE and analysed by CBB staining. Error bars  
657 represent the S.E.M. of three independent experiments.

658

659 **Figure 6 Structure of PDIP38 highlighting the conserved hydrophobic groove**

660 **a.** Ribbon representation of human PDIP38 highlighting its three domains. The N-terminal yccV-  
661 like domain (green) and the C-terminal DUF525 domain (blue) are separated by a hinge or linker  
662 domain (magenta). **b.** Secondary elements are illustrated above the amino acid sequence. Red  
663 scissors indicate the site of cleavage by thermolysin. Underlined protein sequence represents  
664 disordered regions of the protein structure. **c.** Ribbon representation of human PDIP38, highlighting  
665 the conserved hydrophobic residues that line the binding groove. **d-f.** Hydrophobic surface  
666 representation of (d) PDIP38 illustrating the substrate binding groove compared to (e) Human Fbx3  
667 DUF525 domain (PDB code 5HDW) and (f) *Xanthomonas axonopodis* ApaG (PDB code 2F1E).  
668 All figures were generated in ChimeraX\_Daily.

669

670 **Methods**

671 **Plasmids**

672 For *in vitro* transcription and translation of human PDIP38, pOTB7/*PDIP38* was obtained from the  
673 I.M.A.G.E. Consortium (ID 3349399). For the heterologous expression of PDIP38 in *E. coli*, the  
674 cDNA coding for mature PDIP38 (residues 52-368) was amplified by PCR from pOTB7/*PDIP38*  
675 using the appropriate primers (Supplementary Table 3) and cloned into either pHUE<sup>51</sup> between *Sac*  
676 II and *Hind* III (to express untagged PDIP38), pET10N<sup>59</sup> between *Not* I and *Xho* I (to express  
677 PDIP38 with an N-terminal H<sub>10</sub> tag), pET10C<sup>59</sup> between *Nde* I and *Not* I (to express PDIP38 as a  
678 C-terminal H<sub>10</sub> fusion protein), or pGEX-4T-1 between *Bam* HI and *Xho* I (to express PDIP38 as an  
679 N-terminal Glutathione S-transferase (GST) fusion protein). To generate PDIP38<sub>N</sub> (residues 52-153)  
680 and PDIP38<sub>C</sub> (residues 157-368) fused to GST, pGEX-4T/*PDIP38* was subjected to site-directed  
681 mutagenesis<sup>60</sup> using primers PDIP\_bam1 and PDIP\_bam2 (see Supplementary Table 3). The  
682 resulting plasmid (pDT1367, see Supplementary Table 4) contained a stop codon and an additional  
683 *Bam* HI site (and was used directly for expression of GST-PDIP38<sub>N</sub>). To generate GST-PDIP38<sub>C</sub>,  
684 pDT1367 was digested with *Bam* HI, the cut vector ligated lacking the *PDIP38*<sub>N</sub> fragment to  
685 generate pDT1362. Plasmids for bacterial expression of human CLPX (full-length and domain

40922693-file00.docx

686 mutants) and human CLPP (either His-tagged and untagged) were described previously<sup>33</sup>. For  
687 expression of CLPX<sub>4A</sub> and ZBD<sub>4A</sub>, pET10C/hCLPX<sub>4A</sub> and pET10C/hZBD<sub>4A</sub> were generated by site  
688 directed mutagenesis using appropriate primers (see Supplementary Table 3). For details of primer  
689 sequences and plasmid constructs, refer to Supplementary information. All clones were confirmed  
690 by Sanger sequencing.

### 691 **Proteins**

692 Recombinant proteins were expressed, either in BL21-CodonPlus®(DE3)-RIL or XL1-Blue  
693 (Agilent) *Escherichia coli* cells, as appropriate. His-tagged (H<sub>6</sub>- or H<sub>10</sub>-) recombinant proteins were  
694 purified from clarified *E. coli* lysates under native conditions by immobilised metal affinity  
695 chromatography using Ni-NTA agarose (Qiagen) essentially as described<sup>12</sup> using 50 mM Tris-HCl,  
696 [pH 8.0], 300 mM NaCl supplemented with an appropriate concentration of imidazole for binding  
697 (10 or 20 mM), washing (20 mM or 65 mM) and elution (250 mM or 500 mM). Purified His<sub>6</sub>-Ub-  
698 PDIP38 and His<sub>6</sub>-Ub-CLPP were cleaved using His<sub>6</sub>-Usp2cc<sup>51</sup> and the untagged mature proteins  
699 recovered via a method outlined previously<sup>51,61</sup>. GST-PDIP38 was purified by affinity  
700 chromatography using GSH agarose (Bioserve) as outlined by the manufacturer. Radiolabelled  
701 PDIP38 preprotein was synthesized using TNT® SP6 Quick Coupled Transcription-Translation  
702 System (Promega) with undigested pOTB7/PDIP38 as template and 11 µCi of  
703 [<sup>35</sup>S]Met/CysEXPRES<sup>35</sup>S protein labelling mix (specific activity of >1000 Ci/mmol) from Perkin  
704 Elmer. Protein Assay (Bio-Rad) was used to determine protein concentrations using bovine serum  
705 albumin (Thermo Scientific) as a standard. Protein concentrations refer to the protomer unless  
706 otherwise stated. FITC-casein, thermolysin, proteinase K and lysozyme were purchased from  
707 Sigma-Aldrich, DNase I was purchased from Gold Biotechnology. SeeBlue® Plus2 pre-stained and  
708 Mark12<sup>TM</sup> unstained protein standards were from Life Technologies.

### 709 **Electrophoresis and protein detection**

710 Proteins were separated using either glycine- or Tricine-buffered<sup>62</sup> SDS-PAGE. Protein samples in  
711 1 x SDS-PAGE sample buffer (80 mM Tris-HCl [pH 6.8], 2% (w/v) SDS, 5% (v/v) glycerol, 100  
712 mM DTT and 0.02% (w/v) bromophenol blue) were heat treated at 95 °C for 5 min before  
713 separation. For visualization of proteins, gels were stained with Coomassie Brilliant Blue R250  
714 solution (CBB) or transferred to polyvinylidene difluoride (PVDF) membrane using semi-dry method for  
715 immunoblotting. Primary antibodies used were anti-PDIP38 (POLDIP2; Abcam), anti-PDIP38  
716 (125/88; generated in rabbit using purified recombinant PDIP38-H<sub>10</sub> as antigen), affinity purified  
717 anti-CLPX<sup>12</sup>, anti-LONM<sup>12</sup>, anti-TIM23 (BD Biosciences), anti-SDHA (Invitrogen), anti-GST  
718 (GE Healthcare), anti-GAPDH (Life Technologies) and anti-mtHSP60 (N. Hoogenraad, La Trobe  
719 University). Peroxidase coupled secondary antibodies were anti-rabbit, anti-mouse and anti-goat

40922693-file00.docx

720 IgG (Sigma-Aldrich). Antibody complexes were detected using enhanced chemiluminescence  
721 detection reagents (GE Healthcare) and digital images captured using GeneSnap (SynGene) or  
722 Image Lab<sup>TM</sup> (Bio-Rad) Software. FITC-casein was detected by in gel fluorescence (excitation 488  
723 nm and emission 526 nm) while radiolabelled proteins were detected by exposing dried gels to  
724 phosphor screens. Imaging was performed using a Typhoon<sup>TM</sup> Trio variable mode imager and  
725 analysed using ImageQuant software (GE Healthcare).

### 726 ***Limited proteolysis***

727 H<sub>10</sub>PDIP38 (0.1 mg/ml) was subjected to limited proteolysis using thermolysin (0.01 mg/ml) at 30  
728 °C in 50 mM Tris-HCl [pH 7.0], 150 mM NaCl and 5 mM CaCl<sub>2</sub>. To terminate the reaction,  
729 samples were treated with 2 mM PMSF and heated at 95 °C in 1 x SDS-PAGE sample buffer.

### 730 ***Degradation assays***

731 The CLXP-mediated degradation of FITC-casein was performed essentially as described<sup>52</sup>.  
732 Briefly, 0.4 μM CLPX<sub>6P14</sub> was preincubated (at 30 °C for 5 min) in proteolysis buffer (50 mM Tris-  
733 HCl [pH 8.0], 100 mM KCl, 20 mM MgCl<sub>2</sub>, 1 mM DTT, 0.02 % (v/v) Triton X-100, 10 % (v/v)  
734 glycerol) with FITC-casein (0.3 μM) in the absence or presence of 2.4 μM untagged PDIP38. To  
735 initiate degradation 5 mM ATP was added and samples were incubated at 30 °C for the times  
736 indicated. Reactions were terminated by the addition of 1 x sample buffer and the proteins  
737 denatured at 95 °C for 5 min.

### 738 ***In vitro binding analysis***

739 The *in vitro* binding analysis was adapted from the method outlined in<sup>63</sup>. *E. coli* cells containing  
740 expressed GST-PDIP38, GST-PDIP38<sub>N</sub>, GST-PDIP38<sub>C</sub> or untagged PDIP38, were resuspended (5  
741 ml/g wet weight of cells) in Binding Buffer (20 mM HEPES-KOH [pH 7.5], 100 mM K(OAc), 10  
742 mM Mg(OAc), 10 % (v/v) glycerol, 65 mM imidazole) supplemented with 0.5 % (v/v) Triton X-  
743 100, EDTA free protease inhibitor cocktail (Roche), 2 mM PMSF and DNase I (10 μg/ml) then  
744 subjected to chemical lysis with lysozyme (0.2 mg/ml). Cell free lysates or purified untagged  
745 PDIP38, as appropriate, were applied to Ni-NTA agarose beads either lacking or containing  
746 immobilised H<sub>10</sub>-tagged CLPX, CLPX<sub>ZBD</sub>, CLPX<sub>E</sub>, *ec*ClpX<sub>ZBD</sub>, CLPX<sub>4A</sub> or ZBD<sub>4A</sub> and incubated  
747 with end-over-end mixing at 4 °C for 30 min. The beads were then washed with 5 bed volumes (BV)  
748 of Binding Buffer supplemented with 0.5 % (v/v) Triton X-100 followed by 10 BV of Wash Buffer  
749 (Binding buffer supplemented with 0.25 % (v/v) Triton X-100). Bound proteins were eluted with  
750 Elution Buffer (50 mM Tris-HCl [pH 8.0], 300 mM NaCl, 500 mM imidazole). For binding assays  
751 containing full length wild type or mutant CLPX, all buffers were supplemented with 2 mM ATP  
752 and 10 mM β-mercaptoethanol.

40922693-file00.docx

### 753 ***Cell culturing and treatment***

754 HeLa cells were cultured in Dulbecco's Modified Eagle's Medium (Life Technologies)  
755 supplemented with 10 % (v/v) fetal calf serum at 37 °C under an atmosphere of 5 % (v/v) CO<sub>2</sub>.  
756 Transfection of plasmid (10 µg) or 10-20 nM synthetic siRNA (Life Technologies) was performed  
757 using Lipofectamine® 2000 transfection reagent (Life Technologies) as per the manufacturer's  
758 instructions and cells grown for a further 24-72 h, as indicated. For interference of *PDIP38* mRNA  
759 three independent synthetic siRNA (Life Technologies) were used; Silencer No. 22994 and Silencer  
760 Select No. s25055 (s55) and s25056 (s56). The corresponding Silencer Negative Control and  
761 Silencer Select Negative Controls No. 1 (nc1) and No. 2 (nc2) were used. For analysis, cells were  
762 detached by trypsin treatment (0.25% (w/v) trypsin, 1mM EDTA; Invitrogen) and washed cell  
763 pellets lysed using TC extraction buffer (50 mM Tris-HCl [pH 7.5], 375 mM NaCl, 1 mM EDTA, 1%  
764 (v/v) Triton X-100) freshly supplemented with 2 mM phenylmethanesulfonyl fluoride (PMSF).  
765 Soluble lysate was collected and used for analysis.

### 766 ***Mitochondrial isolation and manipulation***

767 Crude mitochondria were isolated from HeLa cells as described<sup>12,64</sup>. *In vitro* import<sup>65</sup> was  
768 performed at 37 °C with [<sup>35</sup>S]Met/Cys-labelled preprotein and isolated mitochondria resuspended in  
769 Import Buffer (20 mM HEPES-KOH [pH 7.4], 250 mM sucrose, 5 mM Mg(OAc), 80 mM K(OAc),  
770 freshly supplemented with 10 mM Na succinate, 1 mM DTT, 2% (w/v) fatty acid free BSA, 5 mM  
771 ATP and 5 mM methionine. A mix of valinomycin (2 µM) and oligomycin (10 µM) was used to  
772 dissipate the membrane potential. Following import, mitochondria resuspended in SEM (250 mM  
773 sucrose, 1 mM EDTA, 10 mM MOPS-KOH [pH 7.2]) were treated with ~40 µg/ml proteinase K  
774 (Prot. K) for 15 min at 4 °C. Mitoplasts were formed in 9 parts EM buffer (10 mM MOPS-KOH  
775 [pH 7.2], 1 mM EDTA) to 1 part SEM buffer at 4 °C for 20 min with gentle pipetting<sup>65</sup>. For  
776 protease treatment, mitochondria in SEM buffer, mitoplasts in EM buffer and lysed mitochondria in  
777 SEM buffer with 0.5 % (v/v) Triton X100 were incubated on ice with 50 µg/ml proteinase K for the  
778 times indicated. Proteinase K was inhibited by the addition of 2 mM phenylmethylsulfonyl fluoride  
779 (PMSF) and proteins were immediately precipitated with TCA for analysis.

### 780 ***Immunoprecipitation***

781 Mitochondrial lysate in immunoprecipitation (IP) Buffer (50 mM Tris-HCl [pH 7.5], 100 mM KCl,  
782 10 mM Mg(OAc), 5% v/v glycerol) containing 0.5 % (v/v) Triton X-100, 10 mM ATP and 2 mM  
783 phenylmethylsulfonyl fluoride (PMSF) was mixed with Protein A-Sepharose covalently attached to  
784 antibodies (anti-PDIP38 or anti-CLPX) by end-over-end rotation for 1 h, at 4°C. Beads were  
785 washed with 3 bed volume (BV) of IP buffer containing 0.25 % (v/v) Triton X-100, 10 mM ATP  
786 and 2 mM PMSF and antibody bound protein eluted using 1 BV of 50 mM glycine [pH 2.5].

40922693-file00.docx

787 ***Crystallisation, X-ray diffraction and structure determination***

788 To investigate the structure of PDIP38, crystal screening was performed and crystals were obtained  
789 using 20% (w/v) PEG8000, 100 mM Hepes, pH 7.5. Crystals of the free and derivatized protein  
790 were frozen in liquid nitrogen and data were collected at 100 K at the Swiss light source (SLS,  
791 Villigen, Switzerland; beamline PXII). Data were recorded on a PILATUS 6M detector (Dectris,  
792 Baden-Daettwil, Switzerland) and data reduction was performed using the program package XDS  
793 <sup>66,67</sup>. The structure of PDIP38 was solved to 3.1 Å by single anomalous dispersion techniques using  
794 one Pt derivative for phasing. The model was refined using PHENIX <sup>68</sup>. Most of the structure was  
795 unambiguously assigned in the electron density map except for residues 52–62 at the N-terminus  
796 and the loop regions (L3 between residues 108–126) and (L4 between residues 144–167), due to  
797 poor density. Supplementary Table 1 provides the statistics for the X-ray data collection and final  
798 refined model. All structural figures were generated using ChimeraX\_Daily.  
799



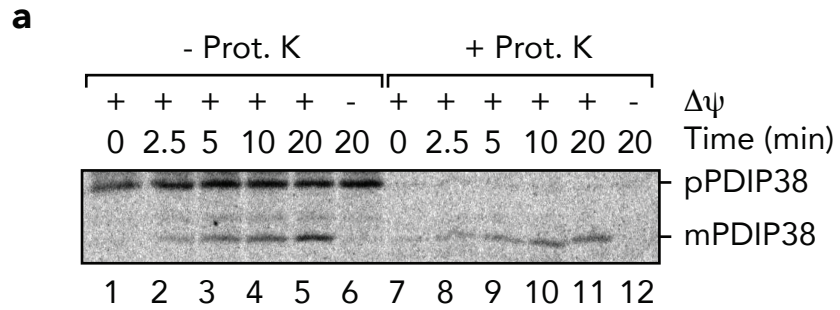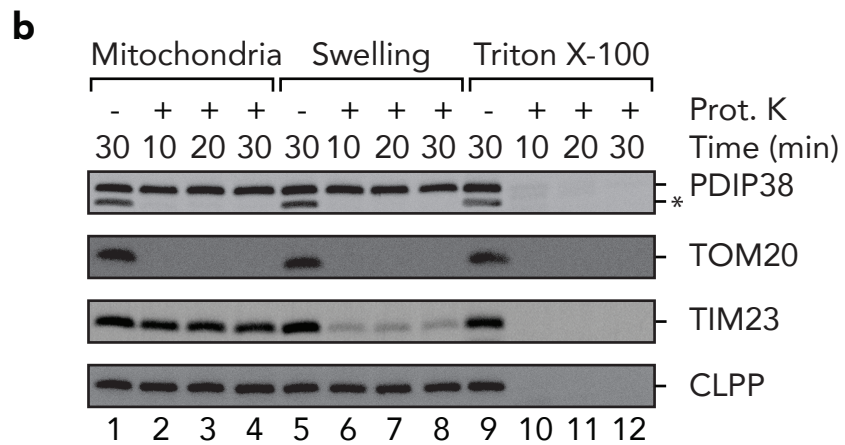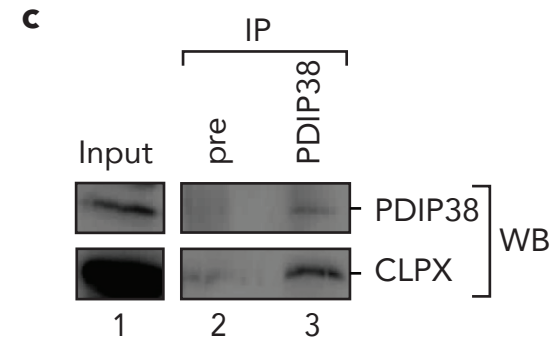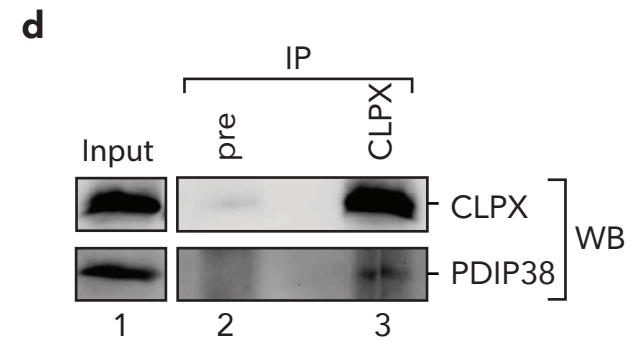

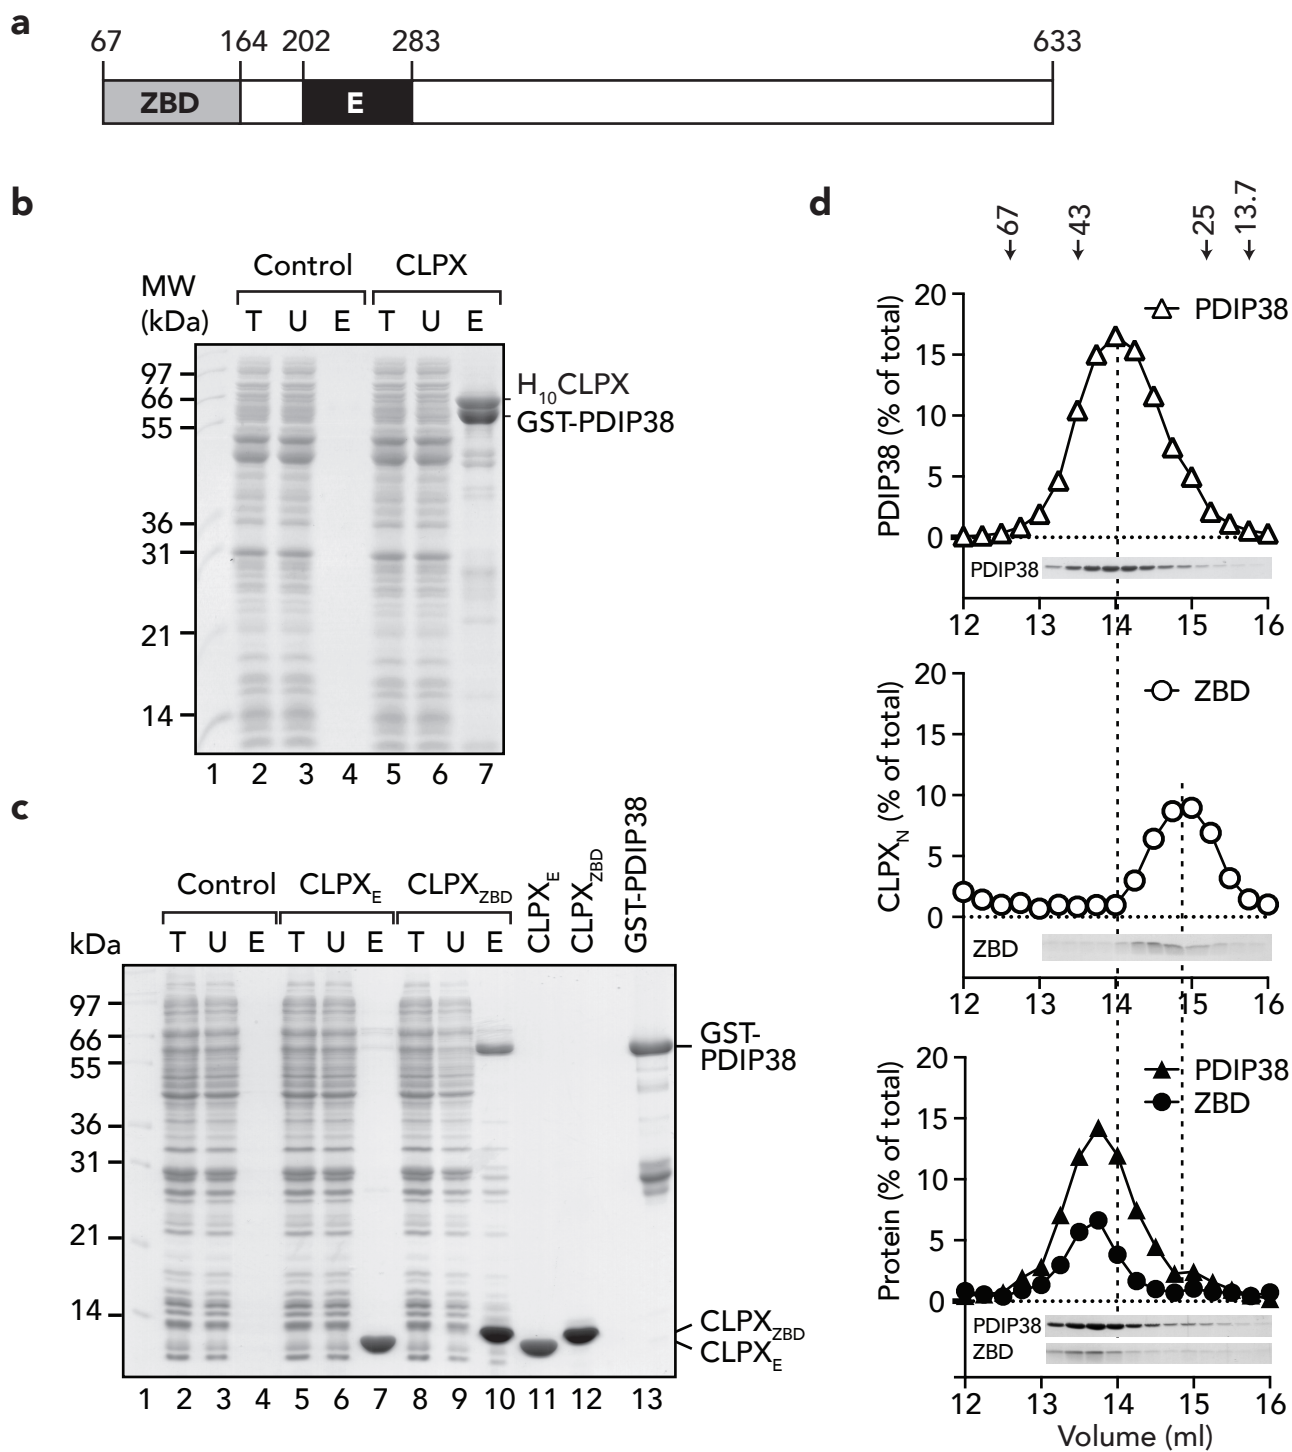

Strack et al., Figure 2

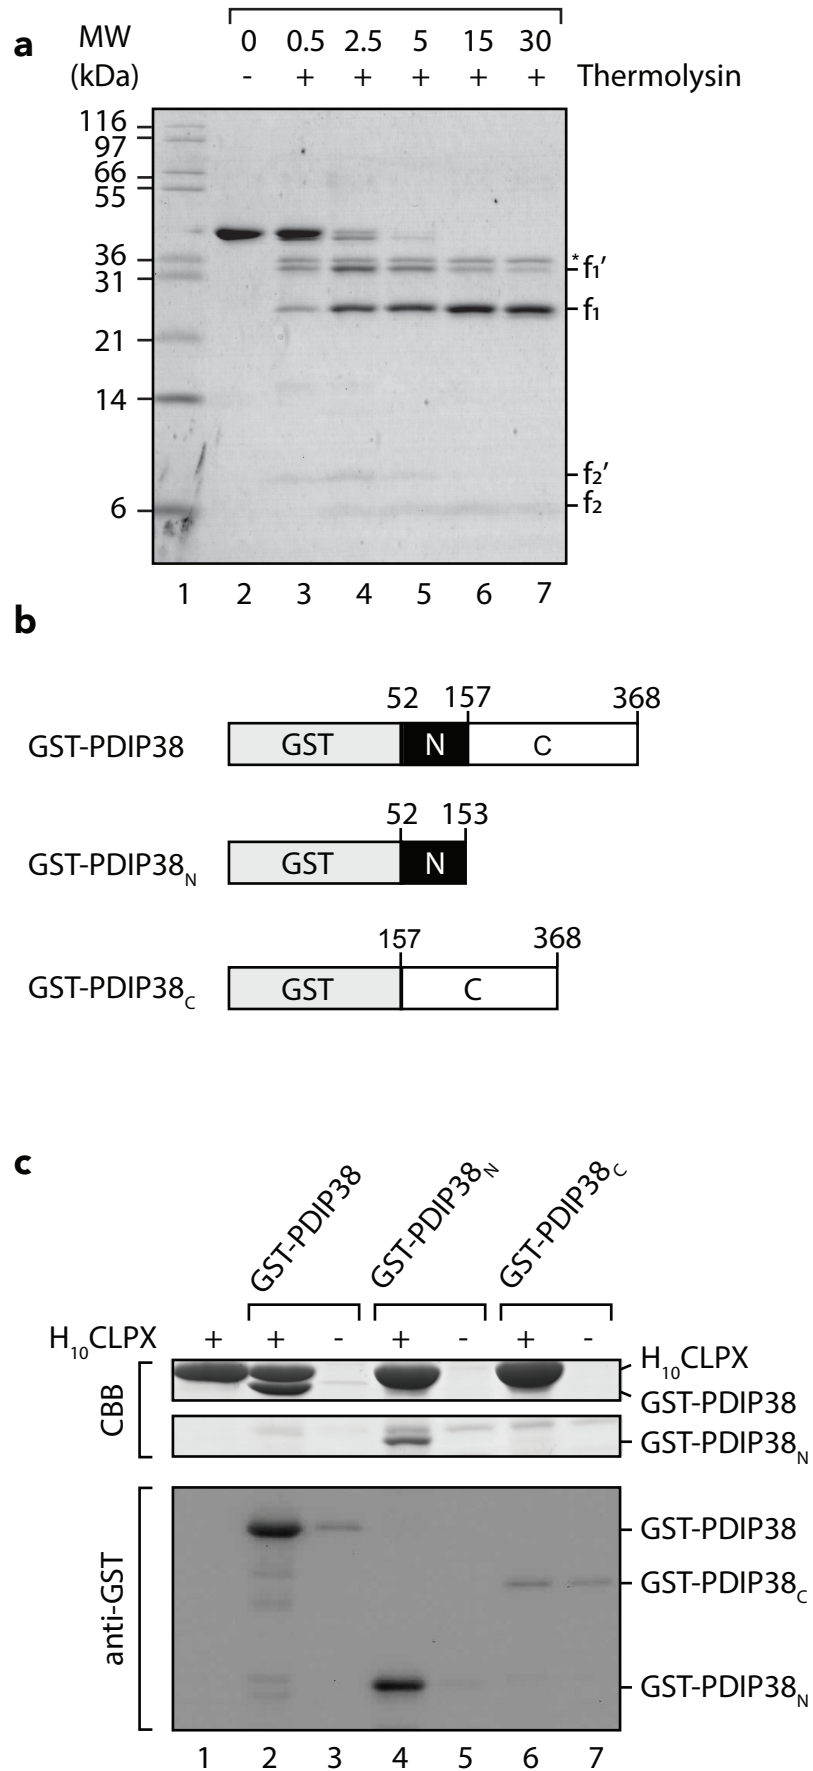

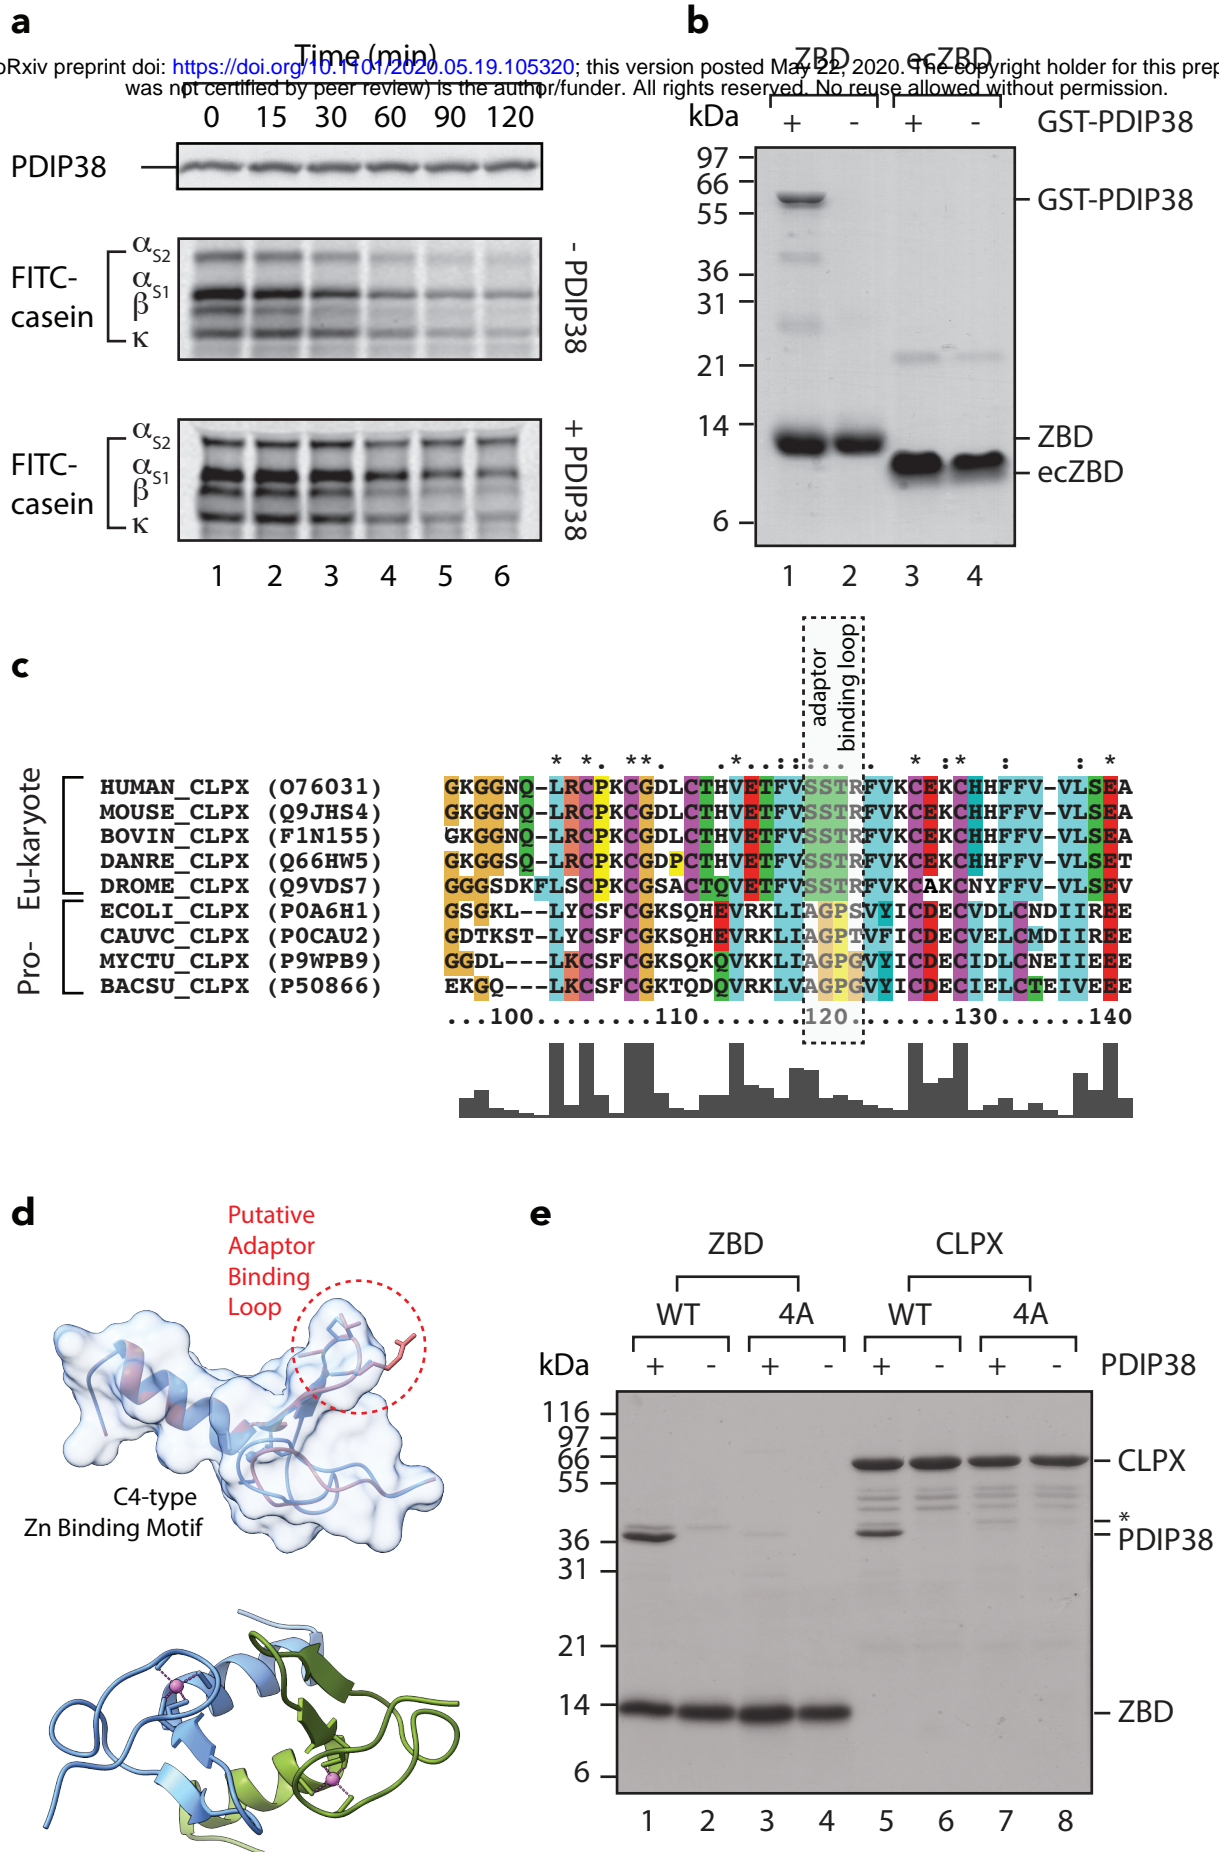

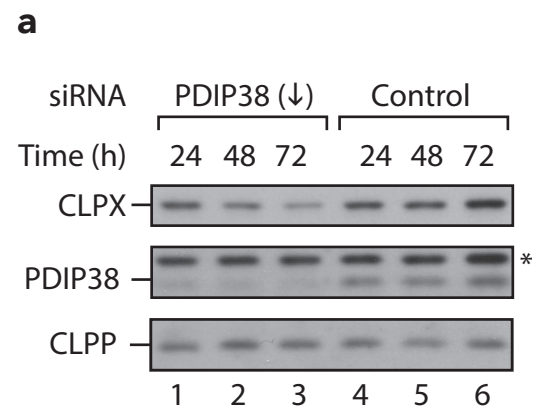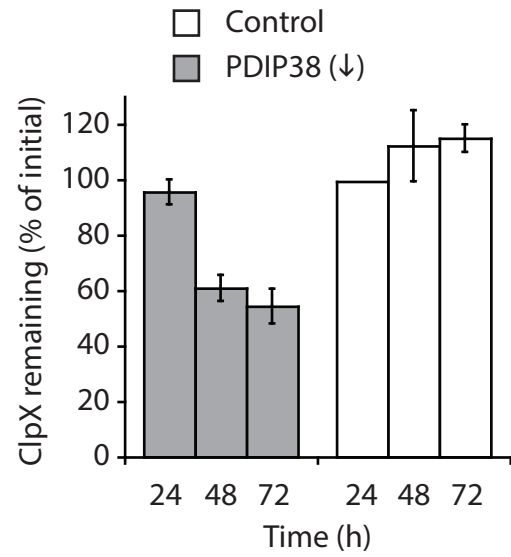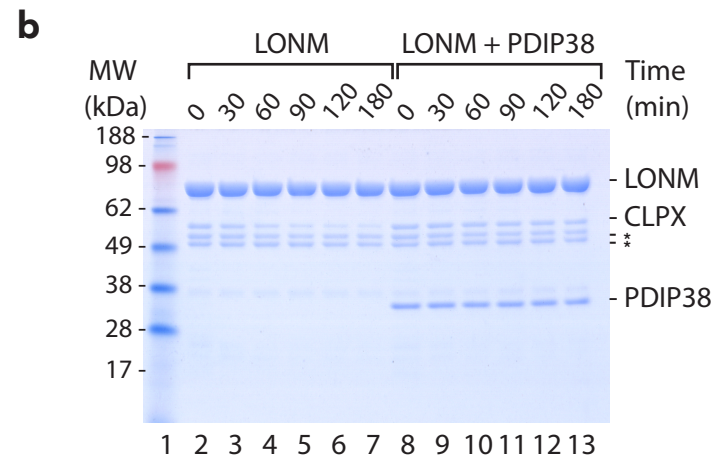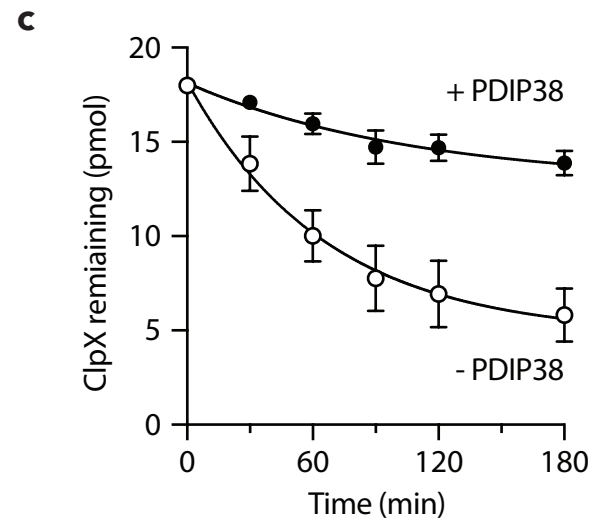

Strack et al., Figure 5

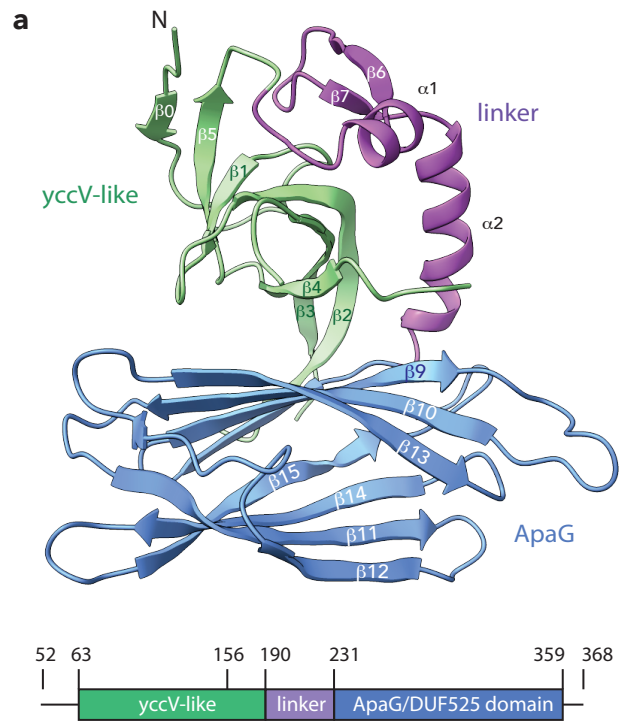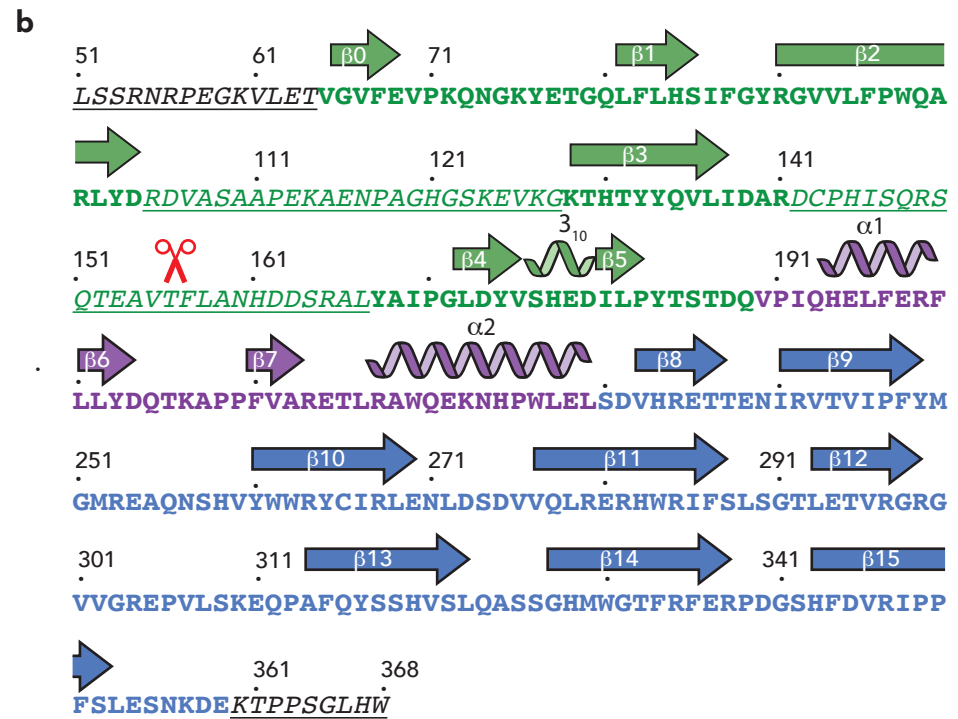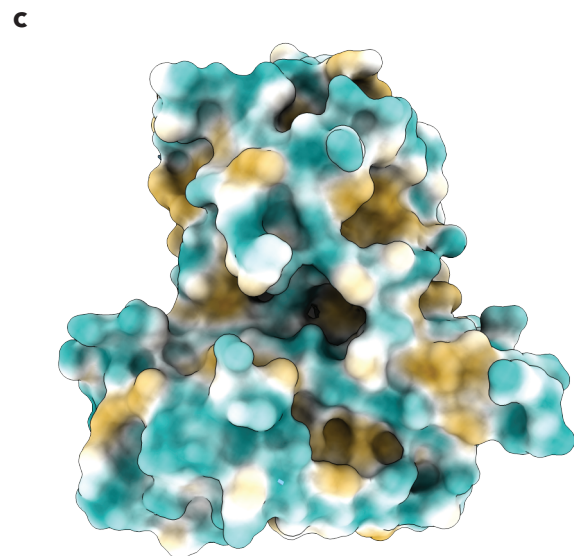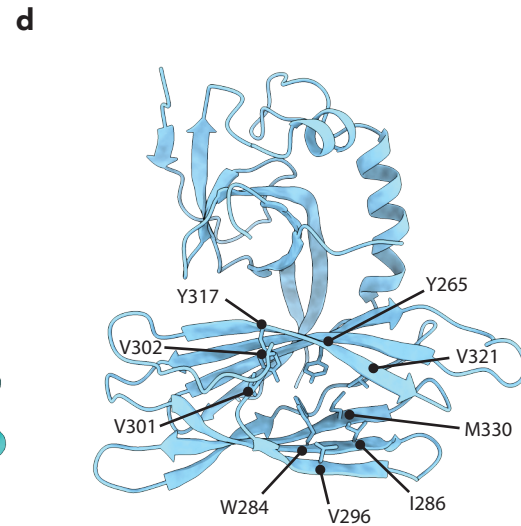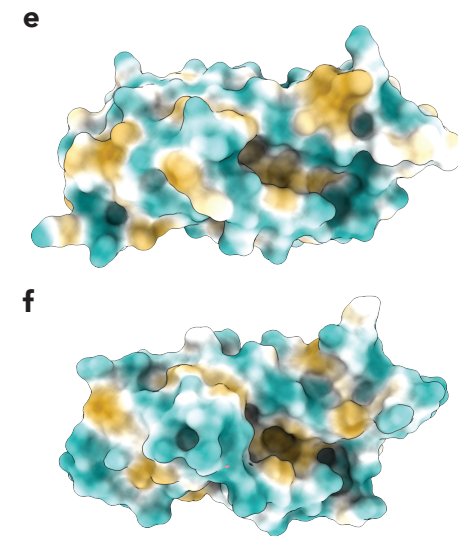

Source: https://www.biorxiv.org/content/10.1101/2020.05.19.105320.full.pdf
